# Supplementary material
Source: publisher figshare collection journal article supplement (https://acs.figshare.com/ndownloader/files/13756145)
Supplement: Supplementary file 1 [file 13756145]

## Sheet: Sheet1
#				Additive	Assembly	Heat challenge
1	7172	A	A	0.341684	0.0732	-0.19172
2	7172	A	S	0.347682	0.138	0.00267086
3	7172	A	T	0.38067	0.0255	0.0156035
4	7172	A	V	0.0447825	0.21	0.426718
5	7172	A	C	0.50364	0.0211	-0.0206072
6	7172	A	E	-0.195974	-0.0083	-0.0731494
7	7172	A	D	-0.114643	0.163	-0.0531458
8	7172	A	K	0.524968	0.277	0.573406
9	7172	A	R	0.288817	0.421	0.611709
10	7172	A	Q	0.384612	0.107	-0.0189355
11	7172	A	N	0.0713121	0.136	0.113124
12	7172	A	M	0.516685	-0.299	-0.0589738
13	7172	A	I	0.376294	0.27	0.741007
14	7172	A	L	0.375354	0.232	0.550105
15	7172	A	H	0.103293	0.224	0.120991
16	7172	A	F	0.313513	-0.479	-0.1958
17	7172	A	Y	0.223758	0.135	0.324496
18	7172	A	W	0.482551	0.6	0.733239
19	7172	A	G	-0.208193	0.0344	-0.634709
20	7172	A	P	-0.251085	0.0981	-0.205637
21	7172	A	*	-1.45531	-1.53	-1.23516
22	7172	S	A	0.457723	0.129	0.301916
23	7172	S	S	0.463722	0.0927	0.29694
24	7172	S	T	0.496709	0.312	0.530698
25	7172	S	V	0.160822	0.318	0.53
26	7172	S	C	0.619679	0.248	0.460424
27	7172	S	E	-0.0799344	0.0289	-0.0183778
28	7172	S	D	0.00139604	-0.109	-0.0394208
29	7172	S	K	0.641007	0.383	0.633201
30	7172	S	R	0.404856	0.313	0.509843
31	7172	S	Q	0.500651	0.169	0.486291
32	7172	S	N	0.187351	0.272	0.527619
33	7172	S	M	0.632724	0.409	0.587415
34	7172	S	I	0.492333	0.269	0.485776
35	7172	S	L	0.491393	0.35	0.554587
36	7172	S	H	0.219332	0.194	0.416251
37	7172	S	F	0.429552	-0.456	-0.417866
38	7172	S	Y	0.339797	0.3	0.586116
39	7172	S	W	0.598591	0.158	0.391585
40	7172	S	G	-0.0921535	0.18	-0.423559
41	7172	S	P	-0.135045	0.134	-0.141681
42	7172	S	*	-1.33927	-1.48	-1.30432
43	7172	T	A	0.535573	0.177	0.37716
44	7172	T	S	0.541571	0.197	0.402014
45	7172	T	T	0.574559	0.29	0.507688
46	7172	T	V	0.238672	0.275	0.458273
47	7172	T	C	0.697529	0.174	0.310208
48	7172	T	E	-0.00208455	-0.102	-0.0999882
49	7172	T	D	0.0792459	-0.00436	-0.109636
50	7172	T	K	0.718857	0.327	0.521753
51	7172	T	R	0.482706	0.258	0.434571
52	7172	T	Q	0.578501	0.239	0.487545
53	7172	T	N	0.265201	0.234	0.422927
54	7172	T	M	0.710574	0.309	0.547991
55	7172	T	I	0.570183	0.265	0.43413
56	7172	T	L	0.569243	0.188	0.45062
57	7172	T	H	0.297182	0.317	0.486402
58	7172	T	F	0.507402	0.0569	0.223996
59	7172	T	Y	0.417647	0.175	0.469629
60	7172	T	W	0.676441	0.189	0.357036
61	7172	T	G	-0.0143036	0.1	0.00679977
62	7172	T	P	-0.0571954	0.0123	-0.383636
63	7172	T	*	-1.26142	-1.2	-1.03635
64	7172	V	A	0.665699	0.728	0.889246
65	7172	V	S	0.671698	0.202	0.440866
66	7172	V	T	0.704685	0.442	0.641767
67	7172	V	V	0.368798	0.373	0.583808
68	7172	V	C	0.827655	0.168	0.372944
69	7172	V	E	0.128042	0.0417	0.263817
70	7172	V	D	0.209372	0.195	0.204012
71	7172	V	K	0.848983	nan	nan
72	7172	V	R	0.612832	0.409	0.338841
73	7172	V	Q	0.708627	nan	nan
74	7172	V	N	0.395327	0.24	0.426055
75	7172	V	M	0.8407	0.493	0.64608
76	7172	V	I	0.700309	0.353	0.604357
77	7172	V	L	0.699369	0.316	0.545574
78	7172	V	H	0.427308	0.424	0.640174
79	7172	V	F	0.637528	0.359	0.648609
80	7172	V	Y	0.547773	0.206	0.480146
81	7172	V	W	0.806567	nan	nan
82	7172	V	G	0.115822	0.599	0.475486
83	7172	V	P	0.0729307	0.368	-0.0878364
84	7172	V	*	-1.1313	nan	nan
85	7172	C	A	0.438428	0.623	0.79205
86	7172	C	S	0.444426	nan	nan
87	7172	C	T	0.477414	nan	nan
88	7172	C	V	0.141527	0.254	0.344171
89	7172	C	C	0.600384	nan	nan
90	7172	C	E	-0.0992297	0.0272	-0.0427623
91	7172	C	D	-0.0178993	-0.00324	0.0032311
92	7172	C	K	0.621712	nan	nan
93	7172	C	R	0.385561	nan	nan
94	7172	C	Q	0.481356	nan	nan
95	7172	C	N	0.168056	nan	nan
96	7172	C	M	0.613429	0.173	0.485838
97	7172	C	I	0.473038	0.555	0.669745
98	7172	C	L	0.472098	0.239	0.590296
99	7172	C	H	0.200037	nan	nan
100	7172	C	F	0.410257	-0.723	-0.270105
101	7172	C	Y	0.320502	nan	nan
102	7172	C	W	0.579295	nan	nan
103	7172	C	G	-0.111449	0.22	0.0686533
104	7172	C	P	-0.154341	nan	nan
105	7172	C	*	-1.35857	nan	nan
106	7172	E	A	-0.813828	0.104	-0.0361245
107	7172	E	S	-0.80783	0.0418	-0.0794572
108	7172	E	T	-0.774843	nan	nan
109	7172	E	V	-1.11073	-0.502	-0.54385
110	7172	E	C	-0.651872	nan	nan
111	7172	E	E	-1.35149	0.132	0.0262994
112	7172	E	D	-1.27016	-0.0378	-0.321184
113	7172	E	K	-0.630545	nan	nan
114	7172	E	R	-0.866696	0.216	0.43007
115	7172	E	Q	-0.770901	nan	nan
116	7172	E	N	-1.0842	nan	nan
117	7172	E	M	-0.638828	-0.103	-0.169699
118	7172	E	I	-0.779219	-0.142	-0.0962785
119	7172	E	L	-0.780159	-0.677	-0.534439
120	7172	E	H	-1.05222	nan	nan
121	7172	E	F	-0.841999	-4	-0.0148923
122	7172	E	Y	-0.931755	nan	nan
123	7172	E	W	-0.672961	nan	nan
124	7172	E	G	-1.36371	0.222	-0.519683
125	7172	E	P	-1.4066	-0.0115	-0.376361
126	7172	E	*	-2.61083	nan	nan
127	7172	D	A	-0.537411	0.226	0.059874
128	7172	D	S	-0.531413	0.0723	-0.322901
129	7172	D	T	-0.498426	0.479	0.289894
130	7172	D	V	-0.834313	-0.182	-0.17245
131	7172	D	C	-0.375455	nan	nan
132	7172	D	E	-1.07507	-0.113	-0.339091
133	7172	D	D	-0.993739	0.0316	-1.04328
134	7172	D	K	-0.354128	0.47	0.668127
135	7172	D	R	-0.590279	0.529	0.726314
136	7172	D	Q	-0.494484	0.422	0.115627
137	7172	D	N	-0.807783	0.137	-0.259868
138	7172	D	M	-0.362411	-0.298	-0.440801
139	7172	D	I	-0.502801	-0.142	0.0671439
140	7172	D	L	-0.503742	0.0131	0.30211
141	7172	D	H	-0.775803	0.331	-0.153895
142	7172	D	F	-0.565582	-1.12	-0.557522
143	7172	D	Y	-0.655338	-1.14	-0.248208
144	7172	D	W	-0.396544	0.379	0.512479
145	7172	D	G	-1.08729	0.235	-0.438409
146	7172	D	P	-1.13018	0.0218	-0.216515
147	7172	D	*	-2.33441	-1.42	-4
148	7172	K	A	0.497683	0.297	0.361403
149	7172	K	S	0.503682	0.409	0.499129
150	7172	K	T	0.536669	0.538	0.70661
151	7172	K	V	0.200782	0.299	0.555591
152	7172	K	C	0.659639	0.723	0.614182
153	7172	K	E	-0.0399744	0.00784	0.0041694
154	7172	K	D	0.041356	0.107	0.0775232
155	7172	K	K	0.680967	0.167	0.0894664
156	7172	K	R	0.444816	0.0426	-0.0529377
157	7172	K	Q	0.540611	nan	nan
158	7172	K	N	0.227311	0.453	0.646002
159	7172	K	M	0.672684	0.329	0.554876
160	7172	K	I	0.532293	0.456	0.713057
161	7172	K	L	0.531353	0.257	0.481446
162	7172	K	H	0.259292	0.297	0.37865
163	7172	K	F	0.469512	-0.324	-0.508608
164	7172	K	Y	0.379757	0.389	0.654724
165	7172	K	W	0.638551	0.404	0.48741
166	7172	K	G	-0.0521935	0.233	0.172166
167	7172	K	P	-0.0950853	0.248	-0.224645
168	7172	K	*	-1.29931	-1.56	-1.19501
169	7172	R	A	-0.0781058	0.433	0.576626
170	7172	R	S	-0.0721076	0.437	0.477516
171	7172	R	T	-0.0391203	0.306	0.429224
172	7172	R	V	-0.375007	0.261	0.434887
173	7172	R	C	0.0838501	0.211	0.41104
174	7172	R	E	-0.615764	0.111	0.273313
175	7172	R	D	-0.534433	0.257	0.149948
176	7172	R	K	0.105178	0.154	-0.100321
177	7172	R	R	-0.130973	0.23	-0.0741403
178	7172	R	Q	-0.0351781	0.357	0.499504
179	7172	R	N	-0.348478	0.531	0.670219
180	7172	R	M	0.0968947	0.181	0.367088
181	7172	R	I	-0.043496	0.106	0.366935
182	7172	R	L	-0.0444361	0.331	0.440638
183	7172	R	H	-0.316497	0.374	0.116167
184	7172	R	F	-0.106277	-0.307	-0.189634
185	7172	R	Y	-0.196032	0.386	0.403129
186	7172	R	W	0.0627615	nan	nan
187	7172	R	G	-0.627983	-0.00117	-0.243052
188	7172	R	P	-0.670875	0.0267	-0.388282
189	7172	R	*	-1.8751	nan	nan
190	7172	Q	A	0.189424	0.187	0.12424
191	7172	Q	S	0.195422	0.197	-0.110357
192	7172	Q	T	0.228409	nan	nan
193	7172	Q	V	-0.107478	0.201	0.48209
194	7172	Q	C	0.35138	nan	nan
195	7172	Q	E	-0.348234	0.0573	-0.0905169
196	7172	Q	D	-0.266903	0.102	0.151563
197	7172	Q	K	0.372708	nan	nan
198	7172	Q	R	0.136557	0.407	0.593744
199	7172	Q	Q	0.232352	nan	nan
200	7172	Q	N	-0.0809481	nan	nan
201	7172	Q	M	0.364424	0.169	0.401865
202	7172	Q	I	0.224034	0.264	0.495497
203	7172	Q	L	0.223094	0.479	0.79041
204	7172	Q	H	-0.0489677	nan	nan
205	7172	Q	F	0.161253	-0.633	-0.287901
206	7172	Q	Y	0.0714976	nan	nan
207	7172	Q	W	0.330291	nan	nan
208	7172	Q	G	-0.360453	0.336	0.157001
209	7172	Q	P	-0.403345	0.273	-0.0471338
210	7172	Q	*	-1.60757	nan	nan
211	7172	N	A	0.28455	0.474	0.711992
212	7172	N	S	0.290548	0.371	0.608791
213	7172	N	T	0.323535	0.467	0.62923
214	7172	N	V	-0.0123518	0.248	0.475172
215	7172	N	C	0.446506	0.323	0.54833
216	7172	N	E	-0.253108	0.0171	0.212571
217	7172	N	D	-0.171778	-0.0801	-0.0563781
218	7172	N	K	0.467833	0.226	0.453966
219	7172	N	R	0.231683	0.273	0.429814
220	7172	N	Q	0.327478	0.312	0.592186
221	7172	N	N	0.0141778	0.359	0.628341
222	7172	N	M	0.45955	0.345	0.512977
223	7172	N	I	0.31916	0.456	0.602971
224	7172	N	L	0.31822	0.227	0.531338
225	7172	N	H	0.0461583	0.4	0.644851
226	7172	N	F	0.256379	-0.467	-0.0735868
227	7172	N	Y	0.166624	0.286	0.474337
228	7172	N	W	0.425417	0.508	0.615383
229	7172	N	G	-0.265327	0.112	-0.101312
230	7172	N	P	-0.308219	0.278	-0.000106173
231	7172	N	*	-1.51245	-1.18	-0.828871
232	7172	M	A	0.111842	-0.0157	0.253687
233	7172	M	S	0.117841	0.0536	0.235156
234	7172	M	T	0.150828	0.166	0.365631
235	7172	M	V	-0.185059	0.0973	0.324771
236	7172	M	C	0.273798	nan	nan
237	7172	M	E	-0.425815	-0.412	-0.409864
238	7172	M	D	-0.344485	-0.216	-0.294591
239	7172	M	K	0.295126	nan	nan
240	7172	M	R	0.058975	0.396	0.84101
241	7172	M	Q	0.15477	nan	nan
242	7172	M	N	-0.15853	0.144	0.357356
243	7172	M	M	0.286843	0.348	0.585939
244	7172	M	I	0.146452	0.224	0.599794
245	7172	M	L	0.145512	0.72	0.743757
246	7172	M	H	-0.126549	0.0975	0.40159
247	7172	M	F	0.0836714	-0.864	-0.671987
248	7172	M	Y	-0.00608392	nan	nan
249	7172	M	W	0.25271	nan	nan
250	7172	M	G	-0.438035	0.189	-0.0865169
251	7172	M	P	-0.480926	0.16	-0.29597
252	7172	M	*	-1.68515	nan	nan
253	7172	I	A	0.345212	0.244	0.44981
254	7172	I	S	0.35121	0.299	0.521732
255	7172	I	T	0.384197	0.336	0.589826
256	7172	I	V	0.0483099	0.31	0.543355
257	7172	I	C	0.507167	0.287	0.309405
258	7172	I	E	-0.192446	-0.178	0.126801
259	7172	I	D	-0.111116	0.0133	-0.0873545
260	7172	I	K	0.528495	0.252	0.418613
261	7172	I	R	0.292344	0.265	0.460216
262	7172	I	Q	0.388139	0.262	0.540375
263	7172	I	N	0.0748395	0.328	0.535253
264	7172	I	M	0.520212	0.144	0.50347
265	7172	I	I	0.379821	0.279	0.524418
266	7172	I	L	0.378881	0.411	0.583713
267	7172	I	H	0.10682	0.289	0.535569
268	7172	I	F	0.317041	0.318	0.577302
269	7172	I	Y	0.227285	0.219	0.469441
270	7172	I	W	0.486079	0.413	0.704005
271	7172	I	G	-0.204665	0.0266	0.0137294
272	7172	I	P	-0.247557	-0.0579	-0.34162
273	7172	I	*	-1.45179	-1.06	-0.964843
274	7172	L	A	0.168732	0.147	0.335497
275	7172	L	S	0.17473	0.0386	0.281469
276	7172	L	T	0.207718	0.0452	0.263295
277	7172	L	V	-0.12817	0.219	0.446092
278	7172	L	C	0.330688	0.151	0.383411
279	7172	L	E	-0.368926	-0.36	-0.564719
280	7172	L	D	-0.287595	-0.244	-0.201662
281	7172	L	K	0.352016	0.417	0.635961
282	7172	L	R	0.115865	0.435	0.516281
283	7172	L	Q	0.21166	0.0969	0.351811
284	7172	L	N	-0.10164	0.274	0.34249
285	7172	L	M	0.343733	0.407	0.583546
286	7172	L	I	0.203342	0.394	0.568839
287	7172	L	L	0.202402	0.413	0.62529
288	7172	L	H	-0.0696595	0.283	0.451797
289	7172	L	F	0.140561	-0.831	-0.463155
290	7172	L	Y	0.0508058	0.339	0.578332
291	7172	L	W	0.309599	nan	nan
292	7172	L	G	-0.381145	-0.0696	-0.460987
293	7172	L	P	-0.424037	-0.15	-0.566121
294	7172	L	*	-1.62827	nan	nan
295	7172	H	A	0.22735	0.27	0.503931
296	7172	H	S	0.233348	0.161	0.25539
297	7172	H	T	0.266336	0.279	0.461949
298	7172	H	V	-0.0695515	0.496	0.746993
299	7172	H	C	0.389306	0.534	0.680683
300	7172	H	E	-0.310308	0.0863	-0.120511
301	7172	H	D	-0.228977	0.21	0.014098
302	7172	H	K	0.410634	0.479	0.501695
303	7172	H	R	0.174483	0.485	0.502255
304	7172	H	Q	0.270278	0.341	0.600994
305	7172	H	N	-0.043022	0.251	0.371042
306	7172	H	M	0.402351	0.223	0.428809
307	7172	H	I	0.26196	0.245	0.497665
308	7172	H	L	0.26102	0.402	0.556175
309	7172	H	H	-0.0110415	0.262	0.455604
310	7172	H	F	0.199179	-0.496	-0.121926
311	7172	H	Y	0.109424	0.337	0.576329
312	7172	H	W	0.368217	-0.0163	0.0390057
313	7172	H	G	-0.322527	0.378	-0.0553987
314	7172	H	P	-0.365419	0.0638	-0.330803
315	7172	H	*	-1.56965	-1.23	-1.26784
316	7172	F	A	0.257863	0.16	0.53559
317	7172	F	S	0.263861	0.179	0.444208
318	7172	F	T	0.296848	0.12	0.427342
319	7172	F	V	-0.0390387	0.214	0.415518
320	7172	F	C	0.419819	0.0901	0.355112
321	7172	F	E	-0.279795	-0.468	-0.457906
322	7172	F	D	-0.198465	-0.625	-0.288682
323	7172	F	K	0.441147	nan	nan
324	7172	F	R	0.204996	0.163	0.375188
325	7172	F	Q	0.300791	nan	nan
326	7172	F	N	-0.0125091	0.113	0.430051
327	7172	F	M	0.432863	-0.0239	0.500673
328	7172	F	I	0.292473	0.233	0.475696
329	7172	F	L	0.291533	0.304	0.51411
330	7172	F	H	0.0194713	0.148	0.439392
331	7172	F	F	0.229692	-0.967	-0.651002
332	7172	F	Y	0.139937	0.621	0.72402
333	7172	F	W	0.39873	nan	nan
334	7172	F	G	-0.292014	0.438	0.0162245
335	7172	F	P	-0.334906	-0.322	-0.576993
336	7172	F	*	-1.53913	nan	nan
337	7172	Y	A	0.408435	0.526	0.789333
338	7172	Y	S	0.414434	0.242	0.462084
339	7172	Y	T	0.447421	0.35	0.541781
340	7172	Y	V	0.111534	0.597	0.671544
341	7172	Y	C	0.570391	0.298	0.493436
342	7172	Y	E	-0.129222	-0.31	-0.348549
343	7172	Y	D	-0.047892	-0.21	-0.405361
344	7172	Y	K	0.591719	0.392	0.509089
345	7172	Y	R	0.355568	0.193	0.35937
346	7172	Y	Q	0.451363	0.439	0.642498
347	7172	Y	N	0.138063	0.418	0.671149
348	7172	Y	M	0.583436	0.489	0.700812
349	7172	Y	I	0.443045	0.331	0.628859
350	7172	Y	L	0.442105	0.28	0.466042
351	7172	Y	H	0.170044	0.219	0.399668
352	7172	Y	F	0.380264	-0.996	-0.395658
353	7172	Y	Y	0.290509	-0.000717	0.226289
354	7172	Y	W	0.549303	nan	nan
355	7172	Y	G	-0.141441	0.294	-0.0595326
356	7172	Y	P	-0.184333	-0.368	-0.503994
357	7172	Y	*	-1.38856	nan	nan
358	7172	W	A	-0.161998	-0.115	-0.596894
359	7172	W	S	-0.156	nan	nan
360	7172	W	T	-0.123012	nan	nan
361	7172	W	V	-0.458899	-0.128	-0.0462764
362	7172	W	C	-4.18366e-05	nan	nan
363	7172	W	E	-0.699656	-0.976	-0.975361
364	7172	W	D	-0.618325	-0.578	-0.831268
365	7172	W	K	0.0212859	nan	nan
366	7172	W	R	-0.214865	nan	nan
367	7172	W	Q	-0.11907	nan	nan
368	7172	W	N	-0.43237	nan	nan
369	7172	W	M	0.0130028	nan	nan
370	7172	W	I	-0.127388	nan	nan
371	7172	W	L	-0.128328	nan	nan
372	7172	W	H	-0.400389	nan	nan
373	7172	W	F	-0.190169	nan	nan
374	7172	W	Y	-0.279924	nan	nan
375	7172	W	W	-0.0211304	nan	nan
376	7172	W	G	-0.711875	0.0071	-0.407959
377	7172	W	P	-0.754766	nan	nan
378	7172	W	*	-1.95899	nan	nan
379	7172	G	A	-0.419624	0.14	-0.69453
380	7172	G	S	-0.413626	0.103	-1.21117
381	7172	G	T	-0.380638	0.31	-0.786106
382	7172	G	V	-0.716526	0.0034	-0.29549
383	7172	G	C	-0.257668	0.151	-0.419034
384	7172	G	E	-0.957282	-0.0633	-1.03766
385	7172	G	D	-0.875951	0.217	-0.684533
386	7172	G	K	-0.23634	0.281	-0.326238
387	7172	G	R	-0.472491	0.0597	-0.217078
388	7172	G	Q	-0.376696	0.376	-0.653344
389	7172	G	N	-0.689996	0.21	-0.972974
390	7172	G	M	-0.244623	-0.188	-0.906728
391	7172	G	I	-0.385014	-0.142	-0.496184
392	7172	G	L	-0.385954	-0.175	-0.184422
393	7172	G	H	-0.658016	0.371	-0.133479
394	7172	G	F	-0.447795	-0.393	-0.543643
395	7172	G	Y	-0.53755	-0.344	-4
396	7172	G	W	-0.278757	nan	nan
397	7172	G	G	-0.969501	0.0465	-1.01268
398	7172	G	P	-1.01239	-0.142	-1.01206
399	7172	G	*	-2.21662	nan	nan
400	7172	P	A	-0.858352	0.0633	-0.803731
401	7172	P	S	-0.852354	0.0731	-0.853505
402	7172	P	T	-0.819366	-0.0187	-0.882954
403	7172	P	V	-1.15525	-0.45	-0.770928
404	7172	P	C	-0.696396	-0.202	-0.813325
405	7172	P	E	-1.39601	-0.0497	-1.2418
406	7172	P	D	-1.31468	-0.267	-1.07473
407	7172	P	K	-0.675068	0.313	-0.648946
408	7172	P	R	-0.911219	0.169	-0.702096
409	7172	P	Q	-0.815424	0.0416	-0.803442
410	7172	P	N	-1.12872	0.112	-0.895853
411	7172	P	M	-0.683351	-0.361	-0.590309
412	7172	P	I	-0.823742	-0.437	-0.743517
413	7172	P	L	-0.824682	-0.154	-0.657059
414	7172	P	H	-1.09674	-0.0293	-0.933324
415	7172	P	F	-0.886523	-0.629	-0.967269
416	7172	P	Y	-0.976278	-0.43	-0.611275
417	7172	P	W	-0.717485	-0.543	-0.795444
418	7172	P	G	-1.40823	0.209	-0.795911
419	7172	P	P	-1.45112	0.0188	-1.13242
420	7172	P	*	-2.65535	-1.31	-1.31869
421	7172	*	A	-4.16927	-4	-0.973963
422	7172	*	S	-4.16327	nan	nan
423	7172	*	T	-4.13028	nan	nan
424	7172	*	V	-4.46617	-1.01	-1.39088
425	7172	*	C	-4.00731	nan	nan
426	7172	*	E	-4.70692	-1.13	-1.95422
427	7172	*	D	-4.62559	-0.963	-1.19686
428	7172	*	K	-3.98598	nan	nan
429	7172	*	R	-4.22213	nan	nan
430	7172	*	Q	-4.12634	nan	nan
431	7172	*	N	-4.43964	nan	nan
432	7172	*	M	-3.99427	-1.39	-1.24194
433	7172	*	I	-4.13466	-1.49	-4
434	7172	*	L	-4.1356	-0.578	-0.719734
435	7172	*	H	-4.40766	nan	nan
436	7172	*	F	-4.19744	-4	-1.38995
437	7172	*	Y	-4.28719	nan	nan
438	7172	*	W	-4.0284	nan	nan
439	7172	*	G	-4.71914	-4	-4
440	7172	*	P	-4.76204	nan	nan
441	7172	*	*	-5.96626	nan	nan
442	7173	A	A	0.299076	0.346	0.691284
443	7173	A	S	0.567863	0.22	0.594775
444	7173	A	T	0.504172	-0.0166	-0.207152
445	7173	A	V	0.812451	-0.185	0.125324
446	7173	A	C	0.142019	0.651	0.521413
447	7173	A	E	0.53945	-0.401	-0.0665218
448	7173	A	D	0.701195	0.0471	-0.0990075
449	7173	A	K	0.110895	0.593	0.762966
450	7173	A	R	0.210031	0.125	0.763963
451	7173	A	Q	0.155211	nan	nan
452	7173	A	N	0.421572	0.29	0.878973
453	7173	A	M	0.1435	0.114	0.314011
454	7173	A	I	-0.223386	-0.0656	-0.310772
455	7173	A	L	0.220716	0.373	0.679704
456	7173	A	H	0.161902	0.415	0.467379
457	7173	A	F	0.159195	0.251	0.396935
458	7173	A	Y	0.0918757	-4	-0.840399
459	7173	A	W	-0.08275	-0.0301	-0.113565
460	7173	A	G	0.529022	0.19	0.391394
461	7173	A	P	-0.819604	0.205	-1.21141
462	7173	A	*	-4.11905	-4	-0.435711
463	7173	S	A	0.415115	0.405	0.628026
464	7173	S	S	0.683903	0.348	0.63904
465	7173	S	T	0.620212	0.0754	0.262163
466	7173	S	V	0.92849	0.31	0.600507
467	7173	S	C	0.258059	0.326	0.433304
468	7173	S	E	0.65549	0.28	0.57821
469	7173	S	D	0.817235	0.538	0.851555
470	7173	S	K	0.226935	0.09	0.46887
471	7173	S	R	0.32607	0.245	0.53623
472	7173	S	Q	0.27125	0.195	0.812672
473	7173	S	N	0.537612	0.171	0.550134
474	7173	S	M	0.259539	0.434	0.438477
475	7173	S	I	-0.107347	-0.68	-0.292996
476	7173	S	L	0.336755	0.0836	0.309973
477	7173	S	H	0.277942	0.0422	0.400117
478	7173	S	F	0.275234	0.00891	0.011454
479	7173	S	Y	0.207915	-0.0885	0.26072
480	7173	S	W	0.0332893	0.319	-0.0240124
481	7173	S	G	0.645061	0.307	0.496093
482	7173	S	P	-0.703564	0.00716	-0.887882
483	7173	S	*	-4.00301	-4	-0.664307
484	7173	T	A	0.492965	0.131	0.378764
485	7173	T	S	0.761752	0.317	0.513115
486	7173	T	T	0.698061	0.0918	0.325724
487	7173	T	V	1.00634	0.446	0.634957
488	7173	T	C	0.335908	0.432	0.443833
489	7173	T	E	0.733339	0.153	0.273025
490	7173	T	D	0.895084	0.0231	0.216553
491	7173	T	K	0.304785	0.148	0.347249
492	7173	T	R	0.40392	0.265	0.423084
493	7173	T	Q	0.3491	0.215	0.476016
494	7173	T	N	0.615461	0.158	0.354188
495	7173	T	M	0.337389	0.085	0.368762
496	7173	T	I	-0.0294972	-0.155	-0.0375593
497	7173	T	L	0.414605	0.074	0.260859
498	7173	T	H	0.355791	0.218	0.406413
499	7173	T	F	0.353084	0.17	0.124956
500	7173	T	Y	0.285765	0.14	0.391817
501	7173	T	W	0.111139	0.158	-0.172093
502	7173	T	G	0.722911	0.295	0.42365
503	7173	T	P	-0.625715	-0.0819	-1.09973
504	7173	T	*	-3.92516	-1.37	-1.4569
505	7173	V	A	0.623091	0.158	0.453912
506	7173	V	S	0.891879	0.25	0.553825
507	7173	V	T	0.828187	0.125	0.402816
508	7173	V	V	1.13647	0.324	0.638509
509	7173	V	C	0.466035	0.187	0.346439
510	7173	V	E	0.863466	0.451	0.589719
511	7173	V	D	1.02521	0.439	0.532193
512	7173	V	K	0.434911	-0.187	0.179166
513	7173	V	R	0.534046	-0.00503	0.273473
514	7173	V	Q	0.479226	-0.156	-0.153814
515	7173	V	N	0.745587	-0.0807	0.313667
516	7173	V	M	0.467515	-0.379	0.548739
517	7173	V	I	0.100629	-1.22	-0.572036
518	7173	V	L	0.544731	0.136	0.361708
519	7173	V	H	0.485918	0.0584	0.12243
520	7173	V	F	0.48321	-0.18	-0.146656
521	7173	V	Y	0.415891	0.113	0.262799
522	7173	V	W	0.241265	0.663	0.286919
523	7173	V	G	0.853037	0.343	0.551405
524	7173	V	P	-0.495589	-0.223	-1.56483
525	7173	V	*	-3.79503	nan	nan
526	7173	C	A	0.39582	0.201	0.688008
527	7173	C	S	0.664607	0.201	0.459653
528	7173	C	T	0.600916	0.213	0.244251
529	7173	C	V	0.909195	0.433	0.703828
530	7173	C	C	0.238763	0.131	0.278105
531	7173	C	E	0.636194	-0.187	0.178448
532	7173	C	D	0.797939	-4	0.413454
533	7173	C	K	0.207639	-4	0.211953
534	7173	C	R	0.306775	0.0648	0.384921
535	7173	C	Q	0.251955	-4	-0.664307
536	7173	C	N	0.518316	0.17	0.195728
537	7173	C	M	0.240244	-0.062	-0.00974204
538	7173	C	I	-0.126642	-0.659	-0.00535307
539	7173	C	L	0.31746	0.000683	0.0559665
540	7173	C	H	0.258646	0.269	0.222756
541	7173	C	F	0.255939	0.0873	0.0152717
542	7173	C	Y	0.18862	0.124	0.0312465
543	7173	C	W	0.013994	-0.229	-1.03777
544	7173	C	G	0.625766	0.319	0.385613
545	7173	C	P	-0.72286	0.0315	-0.544304
546	7173	C	*	-4.02231	-4	-0.435711
547	7173	E	A	-0.856437	-0.305	-0.337311
548	7173	E	S	-0.587649	-0.0866	-0.164244
549	7173	E	T	-0.65134	-0.51	-0.669839
550	7173	E	V	-0.343062	-0.103	-0.555635
551	7173	E	C	-1.01349	nan	nan
552	7173	E	E	-0.616062	-0.231	-0.646855
553	7173	E	D	-0.454317	-0.622	-0.871579
554	7173	E	K	-1.04462	0.00782	0.353885
555	7173	E	R	-0.945482	0.504	0.796992
556	7173	E	Q	-1.0003	-0.038	0.174662
557	7173	E	N	-0.73394	-0.652	-0.0551675
558	7173	E	M	-1.01201	-0.371	0.127811
559	7173	E	I	-1.3789	-0.439	-0.363277
560	7173	E	L	-0.934797	-0.385	0.214803
561	7173	E	H	-0.99361	0.101	0.483912
562	7173	E	F	-0.996318	-0.127	0.0827926
563	7173	E	Y	-1.06364	-0.241	0.47545
564	7173	E	W	-1.23826	0.195	0.440474
565	7173	E	G	-0.62649	-0.493	-0.584254
566	7173	E	P	-1.97512	0.121	-4
567	7173	E	*	-5.27456	-4	-4
568	7173	D	A	-0.58002	0.086	0.232154
569	7173	D	S	-0.311232	0.159	0.11619
570	7173	D	T	-0.374923	-0.272	-1.42361
571	7173	D	V	-0.0666449	-0.0119	-0.570683
572	7173	D	C	-0.737076	0.31	0.693706
573	7173	D	E	-0.339645	-0.313	-1.14143
574	7173	D	D	-0.1779	-0.466	-0.54257
575	7173	D	K	-0.7682	0.142	0.354354
576	7173	D	R	-0.669065	0.142	0.569317
577	7173	D	Q	-0.723885	-0.615	-0.664307
578	7173	D	N	-0.457523	0.215	0.659106
579	7173	D	M	-0.735595	-0.176	-0.104367
580	7173	D	I	-1.10248	-0.314	-0.965337
581	7173	D	L	-0.65838	-0.6	-0.368131
582	7173	D	H	-0.717193	0.00926	0.35953
583	7173	D	F	-0.719901	0.315	0.588099
584	7173	D	Y	-0.78722	0.287	0.674372
585	7173	D	W	-0.961845	0.0349	0.389047
586	7173	D	G	-0.350073	-0.0904	-0.108788
587	7173	D	P	-1.6987	-0.206	-1.12812
588	7173	D	*	-4.99814	-0.615	-4
589	7173	K	A	0.455075	0.302	0.568599
590	7173	K	S	0.723863	0.229	0.501269
591	7173	K	T	0.660171	0.266	0.377422
592	7173	K	V	0.96845	0.749	0.886184
593	7173	K	C	0.298019	-0.314	-0.363277
594	7173	K	E	0.69545	0.161	0.41966
595	7173	K	D	0.857195	0.108	0.373655
596	7173	K	K	0.266895	-0.132	-0.227899
597	7173	K	R	0.36603	-0.116	-0.293658
598	7173	K	Q	0.31121	-0.0213	0.351625
599	7173	K	N	0.577572	0.0365	0.290427
600	7173	K	M	0.299499	0.135	0.316048
601	7173	K	I	-0.067387	-0.361	-0.183028
602	7173	K	L	0.376715	-0.151	0.106658
603	7173	K	H	0.317902	-0.105	0.00816762
604	7173	K	F	0.315194	-0.0776	-0.397986
605	7173	K	Y	0.247875	0.255	0.368018
606	7173	K	W	0.0732492	-0.153	-4
607	7173	K	G	0.685021	0.267	0.518456
608	7173	K	P	-0.663605	0.00778	-0.928675
609	7173	K	*	-3.96305	-1.69	-1.04328
610	7173	R	A	-0.120714	0.385	0.559159
611	7173	R	S	0.148073	0.266	0.459314
612	7173	R	T	0.0843822	0.329	0.518699
613	7173	R	V	0.392661	0.414	0.660883
614	7173	R	C	-0.277771	-0.219	-0.240043
615	7173	R	E	0.11966	0.548	0.727695
616	7173	R	D	0.281405	0.657	0.824534
617	7173	R	K	-0.308895	-0.0961	-0.541978
618	7173	R	R	-0.209759	-0.0493	-0.404014
619	7173	R	Q	-0.264579	0.412	0.597328
620	7173	R	N	0.0017823	-0.0142	0.192095
621	7173	R	M	-0.27629	0.296	0.226547
622	7173	R	I	-0.643176	-0.228	-0.117385
623	7173	R	L	-0.199074	0.0727	-0.0447801
624	7173	R	H	-0.257888	-0.0699	-0.208047
625	7173	R	F	-0.260595	-0.0733	-0.456459
626	7173	R	Y	-0.327914	0.253	0.29116
627	7173	R	W	-0.50254	0.298	-0.574846
628	7173	R	G	0.109232	0.299	0.453549
629	7173	R	P	-1.23939	-0.153	-1.39682
630	7173	R	*	-4.53884	-0.615	-0.589268
631	7173	Q	A	0.146815	0.486	0.742902
632	7173	Q	S	0.415603	0.399	0.904647
633	7173	Q	T	0.351912	-0.149	-0.0938314
634	7173	Q	V	0.66019	0.147	0.221775
635	7173	Q	C	-0.0102409	-0.615	-0.0643793
636	7173	Q	E	0.38719	0.0757	-0.0665218
637	7173	Q	D	0.548935	-0.49	-4
638	7173	Q	K	-0.0413648	0.172	0.650718
639	7173	Q	R	0.0577704	0.322	0.70672
640	7173	Q	Q	0.00295042	0.37	0.695627
641	7173	Q	N	0.269312	0.558	0.897519
642	7173	Q	M	-0.0087601	-0.0808	0.34244
643	7173	Q	I	-0.375647	-4	-4
644	7173	Q	L	0.0684555	0.5	0.719313
645	7173	Q	H	0.00964212	0.0932	0.273376
646	7173	Q	F	0.00693439	-0.0368	-0.134681
647	7173	Q	Y	-0.0603845	0.114	0.263259
648	7173	Q	W	-0.23501	-4	0.133728
649	7173	Q	G	0.376762	0.0982	0.423282
650	7173	Q	P	-0.971864	-0.00118	-1.22992
651	7173	Q	*	-4.27131	-4	-4
652	7173	N	A	0.241941	0.339	0.630944
653	7173	N	S	0.510729	0.318	0.599644
654	7173	N	T	0.447038	0.00487	0.332654
655	7173	N	V	0.755316	0.245	0.751574
656	7173	N	C	0.0848851	0.214	0.303469
657	7173	N	E	0.482316	0.217	0.499628
658	7173	N	D	0.644061	0.289	0.485647
659	7173	N	K	0.0537612	-0.044	0.315373
660	7173	N	R	0.152896	0.142	0.42932
661	7173	N	Q	0.0980764	0.105	0.464207
662	7173	N	N	0.364438	0.0847	0.441321
663	7173	N	M	0.0863659	0.0947	0.297169
664	7173	N	I	-0.280521	-0.0229	0.148146
665	7173	N	L	0.163581	-0.00541	0.351832
666	7173	N	H	0.104768	0.324	0.452819
667	7173	N	F	0.10206	-0.311	-0.0746784
668	7173	N	Y	0.0347414	0.0328	0.040097
669	7173	N	W	-0.139884	nan	nan
670	7173	N	G	0.471888	0.279	0.47924
671	7173	N	P	-0.876738	-0.000844	-0.907988
672	7173	N	*	-4.17618	-4	-0.912832
673	7173	M	A	0.0692338	0.104	0.297413
674	7173	M	S	0.338022	0.327	0.728873
675	7173	M	T	0.27433	0.222	0.252743
676	7173	M	V	0.582609	0.452	0.672485
677	7173	M	C	-0.0878224	0.0155	0.296665
678	7173	M	E	0.309609	0.00446	0.301455
679	7173	M	D	0.471354	-0.363	-0.0418068
680	7173	M	K	-0.118946	nan	nan
681	7173	M	R	-0.0198111	0.462	0.685152
682	7173	M	Q	-0.0746311	nan	nan
683	7173	M	N	0.191731	0.744	1.00926
684	7173	M	M	-0.0863416	nan	nan
685	7173	M	I	-0.453228	-1.14	-0.539369
686	7173	M	L	-0.00912606	0.084	-0.363277
687	7173	M	H	-0.0679394	-0.179	0.0616268
688	7173	M	F	-0.0706471	0.0255	0.186862
689	7173	M	Y	-0.137966	0.0505	0.27398
690	7173	M	W	-0.312592	nan	nan
691	7173	M	G	0.29918	0.104	0.336
692	7173	M	P	-1.04945	-0.05	-1.03416
693	7173	M	*	-4.34889	nan	nan
694	7173	I	A	0.302603	0.369	0.400446
695	7173	I	S	0.571391	0.451	0.712963
696	7173	I	T	0.5077	0.37	0.726734
697	7173	I	V	0.815978	0.119	0.397939
698	7173	I	C	0.145547	0.33	0.293772
699	7173	I	E	0.542978	0.0827	0.223555
700	7173	I	D	0.704723	-0.313	0.202753
701	7173	I	K	0.114423	0.459	0.40156
702	7173	I	R	0.213558	0.0275	0.04429
703	7173	I	Q	0.158738	0.114	0.217502
704	7173	I	N	0.4251	0.419	0.632185
705	7173	I	M	0.147028	0.291	0.562896
706	7173	I	I	-0.219859	-0.823	-0.684843
707	7173	I	L	0.224243	-0.0162	0.138646
708	7173	I	H	0.16543	0.0193	0.347732
709	7173	I	F	0.162722	-0.0204	-0.235289
710	7173	I	Y	0.0954031	0.199	0.396078
711	7173	I	W	-0.0792226	0.239	0.166349
712	7173	I	G	0.53255	0.309	0.500436
713	7173	I	P	-0.816076	-0.477	-1.11639
714	7173	I	*	-4.11552	-0.791	-1.21386
715	7173	L	A	0.126123	0.382	0.701633
716	7173	L	S	0.394911	0.405	0.632475
717	7173	L	T	0.33122	-0.174	0.270814
718	7173	L	V	0.639498	0.227	0.463636
719	7173	L	C	-0.0309327	0.513	0.501504
720	7173	L	E	0.366498	0.1	0.36962
721	7173	L	D	0.528243	0.00599	0.32997
722	7173	L	K	-0.0620566	-0.00886	0.272671
723	7173	L	R	0.0370786	0.134	0.35697
724	7173	L	Q	-0.0177414	0.122	0.394166
725	7173	L	N	0.24862	0.553	0.571147
726	7173	L	M	-0.0294519	-4	0.234508
727	7173	L	I	-0.396338	-0.491	-0.329893
728	7173	L	L	0.0477636	0.263	0.376053
729	7173	L	H	-0.0110497	0.309	0.543551
730	7173	L	F	-0.0137575	0.139	0.0406999
731	7173	L	Y	-0.0810764	0.241	0.386249
732	7173	L	W	-0.255702	-4	-4
733	7173	L	G	0.35607	0.27	0.468076
734	7173	L	P	-0.992556	-0.402	-1.34605
735	7173	L	*	-4.292	-4	-0.435711
736	7173	H	A	0.184741	0.251	0.543653
737	7173	H	S	0.453529	0.383	0.575742
738	7173	H	T	0.389838	0.154	0.23069
739	7173	H	V	0.698116	-0.091	0.21174
740	7173	H	C	0.0276853	0.629	0.51803
741	7173	H	E	0.425116	nan	nan
742	7173	H	D	0.586861	0.336	-4
743	7173	H	K	-0.00343864	-0.0825	0.241234
744	7173	H	R	0.0956966	0.216	0.339889
745	7173	H	Q	0.0408766	0.21	0.709963
746	7173	H	N	0.307238	0.681	0.742931
747	7173	H	M	0.0291661	-0.238	0.0414105
748	7173	H	I	-0.33772	-0.677	-0.835469
749	7173	H	L	0.106382	0.195	0.276884
750	7173	H	H	0.0475683	0.425	0.637511
751	7173	H	F	0.0448605	-0.0885	0.0854229
752	7173	H	Y	-0.0224584	0.0207	0.456126
753	7173	H	W	-0.197084	0.114	-0.435711
754	7173	H	G	0.414688	0.433	0.662807
755	7173	H	P	-0.933938	-0.0412	-1.07717
756	7173	H	*	-4.23338	nan	nan
757	7173	F	A	0.215254	0.475	0.831554
758	7173	F	S	0.484042	0.239	0.550393
759	7173	F	T	0.420351	0.103	0.457213
760	7173	F	V	0.728629	-0.146	0.0294143
761	7173	F	C	0.0581981	0.185	0.374229
762	7173	F	E	0.455629	-4	0.359447
763	7173	F	D	0.617374	-0.752	-0.182897
764	7173	F	K	0.0270742	-0.1	0.359447
765	7173	F	R	0.126209	0.752	0.844636
766	7173	F	Q	0.0713894	-0.1	0.535538
767	7173	F	N	0.337751	0.239	0.768409
768	7173	F	M	0.0596789	0.116	0.216424
769	7173	F	I	-0.307208	-1.23	-0.995302
770	7173	F	L	0.136894	-0.0995	0.033622
771	7173	F	H	0.0780811	0.336	0.349245
772	7173	F	F	0.0753734	-0.217	-0.377335
773	7173	F	Y	0.00805443	0.152	0.260294
774	7173	F	W	-0.166571	-0.107	-0.429968
775	7173	F	G	0.445201	0.249	0.434459
776	7173	F	P	-0.903425	-1.21	-1.33198
777	7173	F	*	-4.20287	-4	-4
778	7173	Y	A	0.365827	0.391	0.445561
779	7173	Y	S	0.634615	0.35	0.684191
780	7173	Y	T	0.570924	0.363	0.823803
781	7173	Y	V	0.879202	0.199	0.456693
782	7173	Y	C	0.208771	0.527	0.546679
783	7173	Y	E	0.606202	0.221	0.211062
784	7173	Y	D	0.767947	-0.125	0.319794
785	7173	Y	K	0.177647	0.159	0.187711
786	7173	Y	R	0.276782	0.0725	-0.104971
787	7173	Y	Q	0.221962	0.0889	-0.736741
788	7173	Y	N	0.488324	0.513	0.565494
789	7173	Y	M	0.210251	0.118	0.286138
790	7173	Y	I	-0.156635	-0.615	-0.736741
791	7173	Y	L	0.287467	0.0522	0.0490605
792	7173	Y	H	0.228654	-0.401	0.0584169
793	7173	Y	F	0.225946	0.00501	-0.237011
794	7173	Y	Y	0.158627	0.284	0.197796
795	7173	Y	W	-0.0159987	0.336	-0.435711
796	7173	Y	G	0.595773	0.57	0.620009
797	7173	Y	P	-0.752852	-1.03	-1.35656
798	7173	Y	*	-4.0523	-4	-4
799	7173	W	A	-0.204606	0.0932	0.303277
800	7173	W	S	0.0641815	0.0823	0.477782
801	7173	W	T	0.000490352	-4	-4
802	7173	W	V	0.308769	-0.176	-0.404594
803	7173	W	C	-0.361663	0.217	0.0187636
804	7173	W	E	0.0357685	-0.678	-0.590523
805	7173	W	D	0.197513	-0.615	-0.637262
806	7173	W	K	-0.392786	nan	nan
807	7173	W	R	-0.293651	0.263	0.173629
808	7173	W	Q	-0.348471	nan	nan
809	7173	W	N	-0.0821096	-0.707	-0.542214
810	7173	W	M	-0.360182	nan	nan
811	7173	W	I	-0.727068	-4	-4
812	7173	W	L	-0.282966	nan	nan
813	7173	W	H	-0.34178	nan	nan
814	7173	W	F	-0.344487	-0.265	-1.6118
815	7173	W	Y	-0.411806	nan	nan
816	7173	W	W	-0.586432	-0.49	-0.543643
817	7173	W	G	0.0253403	-0.0614	0.0205287
818	7173	W	P	-1.32329	-4	-4
819	7173	W	*	-4.62273	nan	nan
820	7173	G	A	-0.462232	0.15	-0.145404
821	7173	G	S	-0.193445	0.23	-0.243094
822	7173	G	T	-0.257136	0.348	-1.07263
823	7173	G	V	0.0511425	-0.142	-1.08668
824	7173	G	C	-0.619289	-0.378	-0.532484
825	7173	G	E	-0.221858	0.111	-0.903365
826	7173	G	D	-0.0601128	0.0149	-0.248512
827	7173	G	K	-0.650413	0.293	0.128819
828	7173	G	R	-0.551277	-0.103	-0.106481
829	7173	G	Q	-0.606097	0.222	-0.198476
830	7173	G	N	-0.339736	-0.157	0.0982216
831	7173	G	M	-0.617808	-0.129	-0.137114
832	7173	G	I	-0.984694	-0.423	-0.485802
833	7173	G	L	-0.540592	-0.732	-0.4145
834	7173	G	H	-0.599406	0.303	0.00860451
835	7173	G	F	-0.602113	-0.405	-0.393473
836	7173	G	Y	-0.669432	-0.975	-0.292323
837	7173	G	W	-0.844058	-0.684	-0.412855
838	7173	G	G	-0.232286	0.00205	-0.318982
839	7173	G	P	-1.58091	-0.00188	-0.473818
840	7173	G	*	-4.88036	-0.664	-4
841	7173	P	A	-0.90096	-0.166	-0.531138
842	7173	P	S	-0.632173	-0.168	-0.884488
843	7173	P	T	-0.695864	0.154	-0.981956
844	7173	P	V	-0.387586	0.00622	-0.543643
845	7173	P	C	-1.05802	-4	-4
846	7173	P	E	-0.660586	-0.1	-0.719734
847	7173	P	D	-0.498841	-0.363	-0.435711
848	7173	P	K	-1.08914	0.243	-0.287636
849	7173	P	R	-0.990005	0.175	-0.494763
850	7173	P	Q	-1.04483	-0.55	-1.12935
851	7173	P	N	-0.778464	-0.404	-0.904246
852	7173	P	M	-1.05654	-1.14	-0.719734
853	7173	P	I	-1.42342	-0.222	-0.50265
854	7173	P	L	-0.97932	-0.49	-0.96796
855	7173	P	H	-1.03813	-0.24	-0.770987
856	7173	P	F	-1.04084	-0.492	-0.439866
857	7173	P	Y	-1.10816	-0.787	-0.601883
858	7173	P	W	-1.28279	-0.615	-0.664307
859	7173	P	G	-0.671014	-0.407	-0.793379
860	7173	P	P	-2.01964	-0.0224	-1.20064
861	7173	P	*	-5.31909	-4	-4
862	7173	*	A	-4.21188	-4	-0.736741
863	7173	*	S	-3.94309	-4	-4
864	7173	*	T	-4.00678	-4	-4
865	7173	*	V	-3.6985	-4	-4
866	7173	*	C	-4.36893	-4	-4
867	7173	*	E	-3.9715	-0.84	-4
868	7173	*	D	-3.80976	-4	-4
869	7173	*	K	-4.40006	nan	nan
870	7173	*	R	-4.30092	-4	-0.687135
871	7173	*	Q	-4.35574	nan	nan
872	7173	*	N	-4.08938	-4	-4
873	7173	*	M	-4.36745	nan	nan
874	7173	*	I	-4.73434	nan	nan
875	7173	*	L	-4.29024	-0.664	-0.736741
876	7173	*	H	-4.34905	-4	-4
877	7173	*	F	-4.35176	-4	-4
878	7173	*	Y	-4.41908	-0.916	-4
879	7173	*	W	-4.5937	nan	nan
880	7173	*	G	-3.98193	-0.88	-1.31023
881	7173	*	P	-5.33055	-4	-4
882	7173	*	*	-8.63	nan	nan
883	7174	A	A	-0.51428	-0.041	-0.323925
884	7174	A	S	-0.995003	-0.223	-0.31204
885	7174	A	T	-1.04931	-0.152	-0.357829
886	7174	A	V	-0.916481	-0.427	-1.06275
887	7174	A	C	0.0483078	0.0511	-0.668582
888	7174	A	E	-0.690202	-0.32	-1.15913
889	7174	A	D	-1.25067	-0.39	-1.4187
890	7174	A	K	-0.726608	0.374	-0.0602583
891	7174	A	R	-0.541273	-0.167	-0.309054
892	7174	A	Q	-0.354824	0.11	-0.95198
893	7174	A	N	-1.93243	-0.238	-0.354147
894	7174	A	M	-0.874712	-0.431	-1.04242
895	7174	A	I	-0.981198	-0.562	-0.862081
896	7174	A	L	-0.973715	-0.578	-0.657731
897	7174	A	H	-0.858275	-0.312	-0.904246
898	7174	A	F	-0.987572	-0.82	-0.854469
899	7174	A	Y	-1.15428	-0.672	-0.361936
900	7174	A	W	-0.942906	-0.664	-4
901	7174	A	G	0.333527	0.222	0.446923
902	7174	A	P	-0.557663	-0.404	-1.23237
903	7174	A	*	-1.52829	-4	-1.14143
904	7174	S	A	-0.398241	-0.0334	-0.390432
905	7174	S	S	-0.878964	-0.253	-0.369091
906	7174	S	T	-0.933272	-0.252	-0.41323
907	7174	S	V	-0.800441	-0.505	-1.21123
908	7174	S	C	0.164347	-0.362	-0.721562
909	7174	S	E	-0.574162	-0.369	-0.960663
910	7174	S	D	-1.13464	-0.366	-0.769299
911	7174	S	K	-0.610569	0.112	-0.156588
912	7174	S	R	-0.425233	0.0922	-0.416733
913	7174	S	Q	-0.238785	-0.0627	-0.909987
914	7174	S	N	-1.8164	-0.344	-0.506179
915	7174	S	M	-0.758672	-0.446	-0.752881
916	7174	S	I	-0.865159	-0.95	-1.14235
917	7174	S	L	-0.857675	-0.655	-0.705756
918	7174	S	H	-0.742236	-0.17	-0.639584
919	7174	S	F	-0.871533	-0.769	-0.795245
920	7174	S	Y	-1.03824	-0.643	-0.669542
921	7174	S	W	-0.826867	-1.64	-1.76113
922	7174	S	G	0.449567	0.326	0.540701
923	7174	S	P	-0.441623	-0.306	-1.25434
924	7174	S	*	-1.41225	-1.2	-0.880829
925	7174	T	A	-0.320391	-0.344	-0.615445
926	7174	T	S	-0.801114	-0.485	-0.655155
927	7174	T	T	-0.855423	-0.567	-0.808358
928	7174	T	V	-0.722591	-0.668	-1.02793
929	7174	T	C	0.242197	-0.405	-0.787085
930	7174	T	E	-0.496312	-0.57	-1.43809
931	7174	T	D	-1.05679	-0.285	-0.837987
932	7174	T	K	-0.532719	-0.182	-0.800116
933	7174	T	R	-0.347384	-0.071	-0.638289
934	7174	T	Q	-0.160935	-0.484	-0.7654
935	7174	T	N	-1.73855	-0.621	-0.909719
936	7174	T	M	-0.680823	-0.618	-0.767168
937	7174	T	I	-0.787309	-0.771	-1.06534
938	7174	T	L	-0.779825	-0.67	-1.0732
939	7174	T	H	-0.664386	-0.334	-0.759052
940	7174	T	F	-0.793683	-0.747	-0.854492
941	7174	T	Y	-0.960394	-0.374	-0.500775
942	7174	T	W	-0.749017	-0.888	-0.508922
943	7174	T	G	0.527417	0.247	0.459185
944	7174	T	P	-0.363774	-0.333	-1.2103
945	7174	T	*	-1.3344	-1.06	-1.25905
946	7174	V	A	-0.190265	-0.331	-0.229467
947	7174	V	S	-0.670988	-0.818	-0.520702
948	7174	V	T	-0.725296	-0.66	-0.495552
949	7174	V	V	-0.592465	-0.622	-0.823675
950	7174	V	C	0.372323	-0.72	-0.884825
951	7174	V	E	-0.366186	-0.302	-0.876545
952	7174	V	D	-0.926659	-0.59	-0.863327
953	7174	V	K	-0.402593	-0.127	-0.501092
954	7174	V	R	-0.217258	-0.06	-0.375189
955	7174	V	Q	-0.0308092	-0.382	-0.877417
956	7174	V	N	-1.60842	-0.639	-0.1398
957	7174	V	M	-0.550697	-0.511	-0.396271
958	7174	V	I	-0.657183	-4	-0.906376
959	7174	V	L	-0.649699	-0.971	-0.68625
960	7174	V	H	-0.53426	-0.815	-0.547846
961	7174	V	F	-0.663557	-0.673	-0.297451
962	7174	V	Y	-0.830268	-0.354	-0.138197
963	7174	V	W	-0.618891	-0.642	-0.521722
964	7174	V	G	0.657543	0.393	0.606797
965	7174	V	P	-0.233647	-0.385	-0.946638
966	7174	V	*	-1.20428	-1.24	-1.56483
967	7174	C	A	-0.417536	-0.4	-0.535369
968	7174	C	S	-0.898259	-0.391	-0.621928
969	7174	C	T	-0.952568	-0.435	-0.583321
970	7174	C	V	-0.819737	-0.482	-0.77549
971	7174	C	C	0.145052	0.113	0.38164
972	7174	C	E	-0.593458	-0.885	-1.34401
973	7174	C	D	-1.15393	-0.527	-1.53937
974	7174	C	K	-0.629864	0.0374	-0.415496
975	7174	C	R	-0.444529	0.0125	-0.612763
976	7174	C	Q	-0.25808	0.0316	-0.347298
977	7174	C	N	-1.83569	-0.182	-0.66322
978	7174	C	M	-0.777968	-0.524	-0.297933
979	7174	C	I	-0.884454	-1.11	-0.654955
980	7174	C	L	-0.87697	-0.569	-0.967232
981	7174	C	H	-0.761531	-0.713	-0.47
982	7174	C	F	-0.890828	-0.42	-0.235964
983	7174	C	Y	-1.05754	-0.189	-0.101413
984	7174	C	W	-0.846162	-0.859	-4
985	7174	C	G	0.430271	0.245	0.38723
986	7174	C	P	-0.460919	-0.506	-0.981769
987	7174	C	*	-1.43155	-0.286	-4
988	7174	E	A	-1.66979	0.278	-0.39156
989	7174	E	S	-2.15052	0.0452	-0.276864
990	7174	E	T	-2.20482	-0.131	-0.68694
991	7174	E	V	-2.07199	-0.494	-1.12979
992	7174	E	C	-1.1072	-0.615	-0.397986
993	7174	E	E	-1.84571	-0.521	-1.4771
994	7174	E	D	-2.40619	0.183	-4
995	7174	E	K	-1.88212	0.0261	-0.138554
996	7174	E	R	-1.69679	0.135	0.0439176
997	7174	E	Q	-1.51034	0.111	-4
998	7174	E	N	-3.08795	-0.143	-0.620819
999	7174	E	M	-2.03022	-0.17	-0.620255
1000	7174	E	I	-2.13671	-1.19	-0.978766
1001	7174	E	L	-2.12923	-0.806	-0.815721
1002	7174	E	H	-2.01379	0.142	-1.69098
1003	7174	E	F	-2.14308	-0.51	-4
1004	7174	E	Y	-2.3098	-0.603	-0.580262
1005	7174	E	W	-2.09842	-0.161	-0.0880744
1006	7174	E	G	-0.821985	-0.464	-0.561657
1007	7174	E	P	-1.71318	-0.389	-1.36741
1008	7174	E	*	-2.68381	-4	-1.62282
1009	7174	D	A	-1.39338	-0.0263	-0.460671
1010	7174	D	S	-1.8741	0.0829	-0.308103
1011	7174	D	T	-1.92841	-0.206	-1.34503
1012	7174	D	V	-1.79558	-0.705	-1.8404
1013	7174	D	C	-0.830788	-0.49	-1.14143
1014	7174	D	E	-1.5693	-0.604	-1.38532
1015	7174	D	D	-2.12977	-0.279	-1.19832
1016	7174	D	K	-1.6057	0.286	-0.90816
1017	7174	D	R	-1.42037	0.0424	-0.991244
1018	7174	D	Q	-1.23392	-0.13	-0.974047
1019	7174	D	N	-2.81153	0.00765	-0.703982
1020	7174	D	M	-1.75381	-0.581	-0.754022
1021	7174	D	I	-1.86029	-1.49	-4
1022	7174	D	L	-1.85281	-0.868	-1.79892
1023	7174	D	H	-1.73737	-0.164	-1.32231
1024	7174	D	F	-1.86667	-4	-4
1025	7174	D	Y	-2.03338	-0.833	-1.44246
1026	7174	D	W	-1.822	-0.664	-4
1027	7174	D	G	-0.545568	-0.193	-0.128199
1028	7174	D	P	-1.43676	-0.166	-0.886559
1029	7174	D	*	-2.40739	-4	-4
1030	7174	K	A	-0.358281	-0.311	-0.765115
1031	7174	K	S	-0.839004	-0.382	-0.685659
1032	7174	K	T	-0.893312	-0.447	-0.739871
1033	7174	K	V	-0.760481	-0.173	-0.979906
1034	7174	K	C	0.204307	-0.254	-0.418704
1035	7174	K	E	-0.534202	-0.692	-1.33583
1036	7174	K	D	-1.09468	-0.621	-1.06736
1037	7174	K	K	-0.570609	-0.333	-1.02247
1038	7174	K	R	-0.385274	-0.292	-1.00654
1039	7174	K	Q	-0.198825	-0.382	-0.810425
1040	7174	K	N	-1.77644	-0.603	-0.911293
1041	7174	K	M	-0.718712	-0.692	-0.815863
1042	7174	K	I	-0.825199	-0.718	-1.03089
1043	7174	K	L	-0.817715	-0.615	-0.617452
1044	7174	K	H	-0.702276	-0.439	-0.824844
1045	7174	K	F	-0.831573	-0.369	-0.580262
1046	7174	K	Y	-0.998284	-0.456	-0.267883
1047	7174	K	W	-0.786907	-0.702	-0.533738
1048	7174	K	G	0.489527	0.288	0.531771
1049	7174	K	P	-0.401663	-0.878	-1.99201
1050	7174	K	*	-1.37229	-1.75	-1.58397
1051	7174	R	A	-0.93407	-0.35	-0.863322
1052	7174	R	S	-1.41479	-0.528	-0.773085
1053	7174	R	T	-1.4691	-0.439	-0.746048
1054	7174	R	V	-1.33627	-0.512	-0.892697
1055	7174	R	C	-0.371482	-0.886	-4
1056	7174	R	E	-1.10999	-0.713	-0.842508
1057	7174	R	D	-1.67046	-0.598	-1.17213
1058	7174	R	K	-1.1464	-0.102	-0.772968
1059	7174	R	R	-0.961063	-0.197	-0.757666
1060	7174	R	Q	-0.774614	-0.562	-0.988801
1061	7174	R	N	-2.35222	-0.491	-0.833093
1062	7174	R	M	-1.2945	-0.66	-0.86864
1063	7174	R	I	-1.40099	-0.788	-1.19965
1064	7174	R	L	-1.3935	-0.538	-0.799933
1065	7174	R	H	-1.27807	-0.0344	-0.202546
1066	7174	R	F	-1.40736	-1.32	-0.798916
1067	7174	R	Y	-1.57407	-0.797	-0.356319
1068	7174	R	W	-1.3627	-1.01	-0.635078
1069	7174	R	G	-0.0862626	0.241	0.416089
1070	7174	R	P	-0.977453	-0.992	-2.31077
1071	7174	R	*	-1.94808	-1.75	-1.33306
1072	7174	Q	A	-0.666541	-0.384	-0.479489
1073	7174	Q	S	-1.14726	-0.302	-0.422019
1074	7174	Q	T	-1.20157	-0.568	-0.584934
1075	7174	Q	V	-1.06874	-0.475	-0.817934
1076	7174	Q	C	-0.103952	-0.63	-4
1077	7174	Q	E	-0.842462	-0.509	-1.01226
1078	7174	Q	D	-1.40293	-0.662	-0.982777
1079	7174	Q	K	-0.878868	0.06	-0.413188
1080	7174	Q	R	-0.693533	-0.0283	-0.470571
1081	7174	Q	Q	-0.507085	-0.347	-0.458263
1082	7174	Q	N	-2.08469	-0.547	-0.866756
1083	7174	Q	M	-1.02697	-0.952	-0.721324
1084	7174	Q	I	-1.13346	-0.405	-0.897289
1085	7174	Q	L	-1.12597	-0.659	-0.669542
1086	7174	Q	H	-1.01054	-0.13	-0.392076
1087	7174	Q	F	-1.13983	-0.401	-0.723924
1088	7174	Q	Y	-1.30654	-0.824	-1.2583
1089	7174	Q	W	-1.09517	-1.28	-0.794905
1090	7174	Q	G	0.181267	0.165	0.446162
1091	7174	Q	P	-0.709923	-0.372	-1.32629
1092	7174	Q	*	-1.68055	-0.879	-1.16726
1093	7174	N	A	-0.571415	-0.244	-0.425004
1094	7174	N	S	-1.05214	-0.427	-0.507761
1095	7174	N	T	-1.10645	-0.241	-0.463835
1096	7174	N	V	-0.973615	-0.241	-1.142
1097	7174	N	C	-0.0088265	-0.633	-0.519484
1098	7174	N	E	-0.747336	-0.441	-1.0432
1099	7174	N	D	-1.30781	-0.626	-0.741973
1100	7174	N	K	-0.783742	0.064	-0.492504
1101	7174	N	R	-0.598407	0.00808	-0.318536
1102	7174	N	Q	-0.411959	-0.225	-0.822313
1103	7174	N	N	-1.98957	-0.475	-0.725286
1104	7174	N	M	-0.931846	-0.411	-0.523484
1105	7174	N	I	-1.03833	-0.914	-1.09636
1106	7174	N	L	-1.03085	-0.74	-0.789673
1107	7174	N	H	-0.91541	-0.126	-0.245748
1108	7174	N	F	-1.04471	-0.766	-0.668105
1109	7174	N	Y	-1.21142	-0.367	-0.652174
1110	7174	N	W	-1.00004	-0.754	-1.19686
1111	7174	N	G	0.276393	0.293	0.514359
1112	7174	N	P	-0.614797	-0.645	-1.12416
1113	7174	N	*	-1.58543	-1.5	-1.57937
1114	7174	M	A	-0.744122	-0.55	-1.28401
1115	7174	M	S	-1.22485	-0.575	-0.934891
1116	7174	M	T	-1.27915	-0.942	-1.31922
1117	7174	M	V	-1.14632	-0.911	-1.25731
1118	7174	M	C	-0.181534	-0.781	-4
1119	7174	M	E	-0.920043	-1.44	-1.6118
1120	7174	M	D	-1.48052	-0.378	-1.69098
1121	7174	M	K	-0.95645	-0.552	-0.994001
1122	7174	M	R	-0.771115	-0.337	-0.775932
1123	7174	M	Q	-0.584666	-0.783	-4
1124	7174	M	N	-2.16228	-0.432	-1.18232
1125	7174	M	M	-1.10455	-0.779	-0.200679
1126	7174	M	I	-1.21104	-0.642	-0.947121
1127	7174	M	L	-1.20356	-0.729	-1.08412
1128	7174	M	H	-1.08812	-0.923	-1.38995
1129	7174	M	F	-1.21741	-1.48	-0.881292
1130	7174	M	Y	-1.38412	-0.733	-0.700462
1131	7174	M	W	-1.17275	-4	-0.452992
1132	7174	M	G	0.103686	0.0437	0.291996
1133	7174	M	P	-0.787504	-4	-0.631519
1134	7174	M	*	-1.75814	-4	-4
1135	7174	I	A	-0.510753	-0.384	-0.37466
1136	7174	I	S	-0.991476	-0.433	-0.697806
1137	7174	I	T	-1.04578	-0.815	-0.966796
1138	7174	I	V	-0.912953	-1.4	-0.930801
1139	7174	I	C	0.0518352	-0.702	-0.543643
1140	7174	I	E	-0.686674	-1.28	-0.646091
1141	7174	I	D	-1.24715	-0.903	-4
1142	7174	I	K	-0.723081	-0.254	-0.617771
1143	7174	I	R	-0.537745	-0.24	-0.73954
1144	7174	I	Q	-0.351297	-0.561	-0.733727
1145	7174	I	N	-1.92891	-0.142	0.116369
1146	7174	I	M	-0.871184	-1.27	-0.702256
1147	7174	I	I	-0.977671	-0.752	-1.67398
1148	7174	I	L	-0.970187	-1.06	-1.07554
1149	7174	I	H	-0.854748	-0.823	-0.325109
1150	7174	I	F	-0.984045	-4	-0.599961
1151	7174	I	Y	-1.15076	-0.702	-0.844673
1152	7174	I	W	-0.939378	nan	nan
1153	7174	I	G	0.337055	0.346	0.56283
1154	7174	I	P	-0.554135	-0.708	-1.62282
1155	7174	I	*	-1.52477	-4	-0.431437
1156	7174	L	A	-0.687232	-0.451	-0.8383
1157	7174	L	S	-1.16796	-0.504	-0.805753
1158	7174	L	T	-1.22226	-0.783	-1.05274
1159	7174	L	V	-1.08943	-1.01	-1.27812
1160	7174	L	C	-0.124644	-0.803	-1.34681
1161	7174	L	E	-0.863154	-0.86	-1.36389
1162	7174	L	D	-1.42363	-0.823	-1.35169
1163	7174	L	K	-0.89956	-0.413	-1.3673
1164	7174	L	R	-0.714225	-0.381	-0.748422
1165	7174	L	Q	-0.527777	-0.66	-0.807994
1166	7174	L	N	-2.10539	-0.711	-0.815676
1167	7174	L	M	-1.04766	-0.888	-0.850721
1168	7174	L	I	-1.15415	-1.41	-0.700422
1169	7174	L	L	-1.14667	-0.981	-0.925752
1170	7174	L	H	-1.03123	-1.03	-0.906182
1171	7174	L	F	-1.16052	-1.11	-0.905394
1172	7174	L	Y	-1.32724	-0.432	-0.467697
1173	7174	L	W	-1.11586	-0.924	-0.662424
1174	7174	L	G	0.160575	0.221	0.458094
1175	7174	L	P	-0.730615	-0.699	-1.32003
1176	7174	L	*	-1.70125	-0.716	-1.14143
1177	7174	H	A	-0.628614	-0.175	-0.446318
1178	7174	H	S	-1.10934	-0.526	-0.499639
1179	7174	H	T	-1.16365	-0.577	-0.610464
1180	7174	H	V	-1.03081	-0.431	-0.848281
1181	7174	H	C	-0.0660263	-0.401	-0.736741
1182	7174	H	E	-0.804536	-0.223	-1.16762
1183	7174	H	D	-1.36501	-0.694	-1.49789
1184	7174	H	K	-0.840942	-0.166	-0.753198
1185	7174	H	R	-0.655607	-0.0192	-0.837799
1186	7174	H	Q	-0.469159	-0.368	-0.752478
1187	7174	H	N	-2.04677	-0.524	-0.885813
1188	7174	H	M	-0.989046	-0.588	-0.948238
1189	7174	H	I	-1.09553	-0.48	-0.568672
1190	7174	H	L	-1.08805	-0.998	-0.800693
1191	7174	H	H	-0.97261	-0.467	-0.70094
1192	7174	H	F	-1.10191	-0.791	-0.238339
1193	7174	H	Y	-1.26862	-1.14	-0.474859
1194	7174	H	W	-1.05724	-4	-0.805638
1195	7174	H	G	0.219193	0.454	0.677732
1196	7174	H	P	-0.671997	-1.11	-1.42091
1197	7174	H	*	-1.64263	-4	-4
1198	7174	F	A	-0.598102	-0.697	-1.07472
1199	7174	F	S	-1.07882	-0.556	-0.783516
1200	7174	F	T	-1.13313	-0.862	-0.942566
1201	7174	F	V	-1.0003	-1.1	-1.05642
1202	7174	F	C	-0.0355135	-1.31	-1.13956
1203	7174	F	E	-0.774023	-0.79	-1.21386
1204	7174	F	D	-1.3345	-1.62	-0.947121
1205	7174	F	K	-0.810429	-0.428	-0.686371
1206	7174	F	R	-0.625094	-0.643	-0.922996
1207	7174	F	Q	-0.438646	-1.07	-1.1135
1208	7174	F	N	-2.01626	0.0423	-0.275896
1209	7174	F	M	-0.958533	-0.82	-0.917314
1210	7174	F	I	-1.06502	-1.51	-1.04169
1211	7174	F	L	-1.05754	-1.02	-0.939625
1212	7174	F	H	-0.942097	-0.879	-1.02076
1213	7174	F	F	-1.07139	-1.51	-1.27251
1214	7174	F	Y	-1.2381	-1.22	-1.31752
1215	7174	F	W	-1.02673	-1.05	-0.819433
1216	7174	F	G	0.249706	0.248	0.450319
1217	7174	F	P	-0.641484	-0.467	-0.866804
1218	7174	F	*	-1.61211	-1.39	-1.44246
1219	7174	Y	A	-0.447529	-0.424	-0.201598
1220	7174	Y	S	-0.928252	-0.157	-0.578018
1221	7174	Y	T	-0.98256	-0.405	-0.778137
1222	7174	Y	V	-0.849729	-1.19	-1.09588
1223	7174	Y	C	0.115059	-0.269	-0.840399
1224	7174	Y	E	-0.62345	-0.706	-1.06797
1225	7174	Y	D	-1.18392	-0.389	-1.44246
1226	7174	Y	K	-0.659857	-0.491	-0.87354
1227	7174	Y	R	-0.474522	-0.312	-0.576387
1228	7174	Y	Q	-0.288073	-0.587	-0.96667
1229	7174	Y	N	-1.86568	-0.453	-0.982576
1230	7174	Y	M	-0.80796	-1.44	-0.888559
1231	7174	Y	I	-0.914447	-1.11	-1.25642
1232	7174	Y	L	-0.906963	-1.07	-0.749859
1233	7174	Y	H	-0.791524	-0.361	-0.812236
1234	7174	Y	F	-0.920821	-1.33	-0.769448
1235	7174	Y	Y	-1.08753	-1.09	-0.78007
1236	7174	Y	W	-0.876155	-4	-0.840399
1237	7174	Y	G	0.400279	0.434	0.532042
1238	7174	Y	P	-0.490911	-1.16	-1.12782
1239	7174	Y	*	-1.46154	-1.05	-4
1240	7174	W	A	-1.01796	-0.86	-1.34857
1241	7174	W	S	-1.49869	-0.523	-0.922139
1242	7174	W	T	-1.55299	-0.821	-1.37295
1243	7174	W	V	-1.42016	-1.17	-1.30807
1244	7174	W	C	-0.455374	-0.744	-1.44246
1245	7174	W	E	-1.19388	-1.03	-1.47691
1246	7174	W	D	-1.75436	-0.879	-4
1247	7174	W	K	-1.23029	-0.584	-1.75793
1248	7174	W	R	-1.04495	-0.688	-0.942933
1249	7174	W	Q	-0.858506	-4	-0.719734
1250	7174	W	N	-2.43612	-0.744	-1.14285
1251	7174	W	M	-1.37839	-1.29	-0.927111
1252	7174	W	I	-1.48488	-4	-4
1253	7174	W	L	-1.4774	-1.48	-0.897289
1254	7174	W	H	-1.36196	-4	-4
1255	7174	W	F	-1.49125	-1.39	-1.69098
1256	7174	W	Y	-1.65796	-1.44	-4
1257	7174	W	W	-1.44659	-4	-4
1258	7174	W	G	-0.170154	-0.135	0.0148248
1259	7174	W	P	-1.06134	-0.957	-1.17513
1260	7174	W	*	-2.03198	-4	-0.840399
1261	7174	G	A	-1.27559	-0.481	-0.535971
1262	7174	G	S	-1.75631	-0.0284	-0.812371
1263	7174	G	T	-1.81062	-0.0772	-0.878719
1264	7174	G	V	-1.67779	-1.01	-1.07064
1265	7174	G	C	-0.713	-0.64	-0.604801
1266	7174	G	E	-1.45151	-0.203	-1.06458
1267	7174	G	D	-2.01198	-0.0247	-0.98173
1268	7174	G	K	-1.48792	0.0443	-0.513366
1269	7174	G	R	-1.30258	-0.244	-0.658944
1270	7174	G	Q	-1.11613	-0.0178	-1.28407
1271	7174	G	N	-2.69374	0.156	-0.667801
1272	7174	G	M	-1.63602	-0.752	-1.23416
1273	7174	G	I	-1.74251	-1.32	-1.23834
1274	7174	G	L	-1.73502	-1.22	-1.10375
1275	7174	G	H	-1.61958	-0.109	-0.678641
1276	7174	G	F	-1.74888	-4	-4
1277	7174	G	Y	-1.91559	-0.68	-0.505871
1278	7174	G	W	-1.70421	-0.514	-1.00329
1279	7174	G	G	-0.427781	-0.0142	-0.312082
1280	7174	G	P	-1.31897	0.0481	-1.01649
1281	7174	G	*	-2.2896	-4	-0.989283
1282	7174	P	A	-1.71432	-0.103	-1.35819
1283	7174	P	S	-2.19504	-0.259	-0.937698
1284	7174	P	T	-2.24935	-0.245	-1.19441
1285	7174	P	V	-2.11652	-0.381	-1.25951
1286	7174	P	C	-1.15173	-0.125	-1.19686
1287	7174	P	E	-1.89024	-0.226	-1.89583
1288	7174	P	D	-2.45071	-0.234	-1.01226
1289	7174	P	K	-1.92664	0.165	-1.10997
1290	7174	P	R	-1.74131	-0.0088	-1.08557
1291	7174	P	Q	-1.55486	-0.142	-1.15907
1292	7174	P	N	-3.13247	-0.484	-1.10895
1293	7174	P	M	-2.07475	-0.627	-2.02678
1294	7174	P	I	-2.18123	-1.29	-1.27915
1295	7174	P	L	-2.17375	-0.888	-1.1559
1296	7174	P	H	-2.05831	0.179	-0.751627
1297	7174	P	F	-2.18761	-0.685	-1.19683
1298	7174	P	Y	-2.35432	-1.28	-0.816644
1299	7174	P	W	-2.14294	-1.48	-4
1300	7174	P	G	-0.866509	-0.407	-0.796875
1301	7174	P	P	-1.7577	-0.197	-1.17662
1302	7174	P	*	-2.72833	-1.24	-1.53937
1303	7174	*	A	-5.02523	-1.35	-1.05393
1304	7174	*	S	-5.50595	-1.79	-1.53914
1305	7174	*	T	-5.56026	-1.69	-1.30396
1306	7174	*	V	-5.42743	-1.44	-1.35053
1307	7174	*	C	-4.46264	-4	-4
1308	7174	*	E	-5.20115	-4	-1.2892
1309	7174	*	D	-5.76163	-4	-1.18311
1310	7174	*	K	-5.23756	-1.33	-1.69721
1311	7174	*	R	-5.05222	-1.49	-1.56483
1312	7174	*	Q	-4.86578	-1.54	-1.67398
1313	7174	*	N	-6.44339	-1.07	-1.91958
1314	7174	*	M	-5.38566	-4	-1.91283
1315	7174	*	I	-5.49215	-1.36	-4
1316	7174	*	L	-5.48467	-1.57	-1.34435
1317	7174	*	H	-5.36923	-0.903	-0.983038
1318	7174	*	F	-5.49852	-0.401	-1.44246
1319	7174	*	Y	-5.66523	-4	-4
1320	7174	*	W	-5.45386	-1.14	-4
1321	7174	*	G	-4.17742	-1.12	-1.21849
1322	7174	*	P	-5.06861	-1.64	-1.60561
1323	7174	*	*	-6.03924	-0.791	-1.62282
1324	7175	A	A	-0.982205	-0.3	-0.921266
1325	7175	A	S	-1.04985	-0.0416	-1.14802
1326	7175	A	T	-1.14941	-0.165	-1.45964
1327	7175	A	V	0.424152	0.293	0.660973
1328	7175	A	C	-1.40416	-0.0943	-0.516026
1329	7175	A	E	-1.6832	-0.328	-1.34075
1330	7175	A	D	-1.27342	-0.37	-1.01649
1331	7175	A	K	-0.949645	-0.00265	-1.23441
1332	7175	A	R	-0.95883	0.0746	-1.07328
1333	7175	A	Q	-4.11905	-0.047	-0.628305
1334	7175	A	N	-1.52829	0.0842	-0.961576
1335	7175	A	M	-0.677162	-0.113	-0.991043
1336	7175	A	I	0.0429975	0.682	1.06419
1337	7175	A	L	-0.0201728	-0.34	-0.488486
1338	7175	A	H	-0.382166	-0.209	-1.13635
1339	7175	A	F	-0.426636	-0.269	-0.816919
1340	7175	A	Y	-1.52829	-1.08	-1.09143
1341	7175	A	W	-0.981198	-0.671	-0.595161
1342	7175	A	G	-0.874736	0.195	-1.10341
1343	7175	A	P	-0.170845	0.281	-0.832604
1344	7175	A	*	-4.11905	-1.53	-1.38137
1345	7175	S	A	-0.866166	-0.396	-1.09717
1346	7175	S	S	-0.933809	-0.353	-1.09073
1347	7175	S	T	-1.03337	-0.477	-1.35692
1348	7175	S	V	0.540191	0.572	0.738928
1349	7175	S	C	-1.28812	-0.441	-0.724605
1350	7175	S	E	-1.56716	-0.478	-1.54564
1351	7175	S	D	-1.15738	-0.426	-1.50412
1352	7175	S	K	-0.833605	-0.187	-1.49223
1353	7175	S	R	-0.84279	-0.183	-1.14989
1354	7175	S	Q	-4.00301	-0.392	-0.988968
1355	7175	S	N	-1.41225	-0.341	-1.45581
1356	7175	S	M	-0.561123	-0.378	-0.750056
1357	7175	S	I	0.159037	0.394	0.722859
1358	7175	S	L	0.0958665	-0.0434	0.130963
1359	7175	S	H	-0.266126	-0.744	-1.39458
1360	7175	S	F	-0.310597	-0.581	-0.756253
1361	7175	S	Y	-1.41225	-0.517	-1.06852
1362	7175	S	W	-0.865159	-1.26	-1.35023
1363	7175	S	G	-0.758697	-0.0166	-0.928911
1364	7175	S	P	-0.0548059	0.308	-0.936077
1365	7175	S	*	-4.00301	-1.44	-1.79892
1366	7175	T	A	-0.788316	-0.425	-1.24061
1367	7175	T	S	-0.855959	-0.562	-1.22566
1368	7175	T	T	-0.955519	-0.649	-1.16739
1369	7175	T	V	0.618041	0.205	0.413009
1370	7175	T	C	-1.21027	-0.631	-1.15816
1371	7175	T	E	-1.48931	-0.59	-1.2586
1372	7175	T	D	-1.07953	-0.352	-1.24204
1373	7175	T	K	-0.755755	-0.362	-1.3139
1374	7175	T	R	-0.76494	-0.278	-1.34303
1375	7175	T	Q	-3.92516	-0.628	-1.79892
1376	7175	T	N	-1.3344	-0.382	-1.07433
1377	7175	T	M	-0.483273	-0.705	-0.766825
1378	7175	T	I	0.236887	0.24	0.473764
1379	7175	T	L	0.173716	-0.299	-0.110927
1380	7175	T	H	-0.188277	-0.596	-1.48584
1381	7175	T	F	-0.232747	-0.682	-0.898304
1382	7175	T	Y	-1.3344	-0.672	-0.835737
1383	7175	T	W	-0.787309	-0.83	-1.41374
1384	7175	T	G	-0.680847	-0.261	-1.20933
1385	7175	T	P	0.0230439	0.172	-1.10525
1386	7175	T	*	-3.92516	-1.77	-2.41798
1387	7175	V	A	-0.65819	-0.434	-0.646731
1388	7175	V	S	-0.725833	-0.585	-1.35936
1389	7175	V	T	-0.825393	-0.633	-1.42685
1390	7175	V	V	0.748167	0.456	0.657446
1391	7175	V	C	-1.08015	-0.533	-0.679593
1392	7175	V	E	-1.35918	-0.586	-2.08892
1393	7175	V	D	-0.949405	-0.597	-1.10528
1394	7175	V	K	-0.625629	-0.346	-0.995189
1395	7175	V	R	-0.634814	-0.307	-1.30036
1396	7175	V	Q	-3.79503	-1.01	-4
1397	7175	V	N	-1.20428	-0.583	-1.19858
1398	7175	V	M	-0.353147	0.0602	-0.344458
1399	7175	V	I	0.367013	0.272	0.627114
1400	7175	V	L	0.303842	-0.0858	0.203565
1401	7175	V	H	-0.0581505	-1.04	-1.75793
1402	7175	V	F	-0.102621	-0.722	-0.617186
1403	7175	V	Y	-1.20428	-1.38	-1.06671
1404	7175	V	W	-0.657183	-1.16	-1.75329
1405	7175	V	G	-0.550721	-0.312	-1.24614
1406	7175	V	P	0.15317	0.318	-0.558946
1407	7175	V	*	-3.79503	-1.49	-2.01649
1408	7175	C	A	-0.885461	-0.567	-1.2638
1409	7175	C	S	-0.953104	-0.113	-1.11588
1410	7175	C	T	-1.05266	-0.587	-1.75793
1411	7175	C	V	0.520896	0.393	0.56105
1412	7175	C	C	-1.30742	-0.462	-0.593886
1413	7175	C	E	-1.58645	-0.886	-4
1414	7175	C	D	-1.17668	-0.59	-4
1415	7175	C	K	-0.852901	0.185	-4
1416	7175	C	R	-0.862086	-0.233	-1.86586
1417	7175	C	Q	-4.02231	-0.282	-0.840399
1418	7175	C	N	-1.43155	-0.563	-1.01862
1419	7175	C	M	-0.580418	-0.142	-1.14143
1420	7175	C	I	0.139741	0.789	0.761981
1421	7175	C	L	0.0765712	0.241	0.439394
1422	7175	C	H	-0.285422	-0.617	-1.53937
1423	7175	C	F	-0.329892	-0.414	-0.374835
1424	7175	C	Y	-1.43155	-1.14	-0.459536
1425	7175	C	W	-0.884454	-0.71	-0.840399
1426	7175	C	G	-0.777992	-0.172	-1.18458
1427	7175	C	P	-0.0741012	0.32	-0.092891
1428	7175	C	*	-4.02231	-4	-1.21386
1429	7175	E	A	-2.13772	-0.317	-1.65325
1430	7175	E	S	-2.20536	-0.234	-1.56016
1431	7175	E	T	-2.30492	-0.414	-1.31564
1432	7175	E	V	-0.731361	-0.55	-0.651516
1433	7175	E	C	-2.55967	-0.399	-0.943748
1434	7175	E	E	-2.83871	-0.273	-1.31851
1435	7175	E	D	-2.42893	-0.229	-1.6118
1436	7175	E	K	-2.10516	-0.402	-1.24075
1437	7175	E	R	-2.11434	-0.415	-1.42836
1438	7175	E	Q	-5.27456	-0.435	-1.142
1439	7175	E	N	-2.68381	-0.356	-1.4979
1440	7175	E	M	-1.83267	-0.134	-1.38995
1441	7175	E	I	-1.11252	-0.84	-0.310272
1442	7175	E	L	-1.17569	0.0953	-0.422564
1443	7175	E	H	-1.53768	-0.665	-1.39788
1444	7175	E	F	-1.58215	-0.324	-0.775076
1445	7175	E	Y	-2.68381	-0.877	-1.22833
1446	7175	E	W	-2.13671	-0.877	-1.59044
1447	7175	E	G	-2.03025	-0.00677	-1.08507
1448	7175	E	P	-1.32636	-0.0308	-0.955015
1449	7175	E	*	-5.27456	-1.74	-1.06225
1450	7175	D	A	-1.8613	0.435	-1.75793
1451	7175	D	S	-1.92894	-0.435	-1.43515
1452	7175	D	T	-2.0285	-0.252	-1.19947
1453	7175	D	V	-0.454943	-0.294	0.10444
1454	7175	D	C	-2.28326	-0.383	-0.969612
1455	7175	D	E	-2.56229	-0.291	-1.49789
1456	7175	D	D	-2.15252	-0.224	-4
1457	7175	D	K	-1.82874	-0.153	-1.11539
1458	7175	D	R	-1.83792	-0.317	-1.56569
1459	7175	D	Q	-4.99814	-0.27	-0.909649
1460	7175	D	N	-2.40739	-0.149	-1.1648
1461	7175	D	M	-1.55626	-0.422	-4
1462	7175	D	I	-0.836098	0.216	0.501661
1463	7175	D	L	-0.899268	0.147	-0.19745
1464	7175	D	H	-1.26126	-0.548	-1.4187
1465	7175	D	F	-1.30573	-0.721	-0.571159
1466	7175	D	Y	-2.40739	-0.615	-1.31077
1467	7175	D	W	-1.86029	-1.1	-1.61855
1468	7175	D	G	-1.75383	-0.283	-1.01747
1469	7175	D	P	-1.04994	-0.135	-1.36328
1470	7175	D	*	-4.99814	-0.916	-0.965337
1471	7175	K	A	-0.826206	-0.663	-1.35228
1472	7175	K	S	-0.893849	-0.401	-1.023
1473	7175	K	T	-0.993409	-0.396	-0.933163
1474	7175	K	V	0.580151	0.494	0.693672
1475	7175	K	C	-1.24816	-0.366	-1.1969
1476	7175	K	E	-1.5272	-0.329	-1.42279
1477	7175	K	D	-1.11742	-0.25	-1.26186
1478	7175	K	K	-0.793645	-0.0373	-1.01863
1479	7175	K	R	-0.80283	-0.0627	-1.06877
1480	7175	K	Q	-3.96305	-0.355	-1.23358
1481	7175	K	N	-1.37229	-0.156	-0.965091
1482	7175	K	M	-0.521163	-0.503	-0.87712
1483	7175	K	I	0.198997	0.436	0.649708
1484	7175	K	L	0.135826	-0.184	-0.0953587
1485	7175	K	H	-0.226166	-0.401	-0.888666
1486	7175	K	F	-0.270637	-1	-0.844673
1487	7175	K	Y	-1.37229	-0.555	-0.960401
1488	7175	K	W	-0.825199	-0.436	-1.01479
1489	7175	K	G	-0.718737	0.0418	-0.886742
1490	7175	K	P	-0.0148459	0.142	-0.888288
1491	7175	K	*	-3.96305	-1.48	-1.76113
1492	7175	R	A	-1.402	-0.456	-1.0911
1493	7175	R	S	-1.46964	-0.352	-1.12357
1494	7175	R	T	-1.5692	-0.418	-1.02799
1495	7175	R	V	0.00436197	0.611	0.611788
1496	7175	R	C	-1.82395	-0.408	-1.02939
1497	7175	R	E	-2.10299	-0.523	-1.17336
1498	7175	R	D	-1.69321	-0.143	-1.16495
1499	7175	R	K	-1.36943	-0.101	-1.04205
1500	7175	R	R	-1.37862	-0.0788	-1.04106
1501	7175	R	Q	-4.53884	-0.484	-2.21386
1502	7175	R	N	-1.94808	-0.177	-1.00805
1503	7175	R	M	-1.09695	-0.525	-1.07611
1504	7175	R	I	-0.376792	0.274	0.503529
1505	7175	R	L	-0.439963	0.246	0.40678
1506	7175	R	H	-0.801956	-0.805	-1.28464
1507	7175	R	F	-0.846426	-0.459	-0.213605
1508	7175	R	Y	-1.94808	-0.44	-0.74206
1509	7175	R	W	-1.40099	-0.871	-1.36536
1510	7175	R	G	-1.29453	-0.129	-1.05652
1511	7175	R	P	-0.590635	0.144	-1.04164
1512	7175	R	*	-4.53884	-1.15	-0.843821
1513	7175	Q	A	-1.13447	-0.464	-1.45547
1514	7175	Q	S	-1.20211	-0.411	-1.12119
1515	7175	Q	T	-1.30167	-0.302	-1.09031
1516	7175	Q	V	0.271892	0.329	0.431751
1517	7175	Q	C	-1.55642	-0.466	-0.734685
1518	7175	Q	E	-1.83546	-0.532	-1.8404
1519	7175	Q	D	-1.42568	-0.675	-0.969612
1520	7175	Q	K	-1.1019	-0.208	-1.25114
1521	7175	Q	R	-1.11109	-0.218	-1.03082
1522	7175	Q	Q	-4.27131	-0.436	-1.39653
1523	7175	Q	N	-1.68055	-0.233	-0.886365
1524	7175	Q	M	-0.829422	-0.757	-1.02076
1525	7175	Q	I	-0.109263	0.627	0.919537
1526	7175	Q	L	-0.172433	-0.296	-0.494964
1527	7175	Q	H	-0.534426	-0.559	-0.743606
1528	7175	Q	F	-0.578896	-0.84	-0.575615
1529	7175	Q	Y	-1.68055	-0.883	-1.19686
1530	7175	Q	W	-1.13346	-0.471	-1.02076
1531	7175	Q	G	-1.027	0.283	-0.843179
1532	7175	Q	P	-0.323105	0.231	-1.08958
1533	7175	Q	*	-4.27131	-4	-1.74349
1534	7175	N	A	-1.03934	-0.706	-0.956265
1535	7175	N	S	-1.10698	-0.608	-1.36638
1536	7175	N	T	-1.20654	-0.641	-0.9098
1537	7175	N	V	0.367018	0.302	0.373349
1538	7175	N	C	-1.46129	-0.418	-0.636055
1539	7175	N	E	-1.74033	-0.369	-1.09205
1540	7175	N	D	-1.33055	-0.43	-1.4569
1541	7175	N	K	-1.00678	-0.385	-1.21099
1542	7175	N	R	-1.01596	-0.418	-1.34377
1543	7175	N	Q	-4.17618	-0.634	-1.6855
1544	7175	N	N	-1.58543	-0.582	-1.24816
1545	7175	N	M	-0.734296	-0.0211	-0.858065
1546	7175	N	I	-0.0141368	0.596	0.933451
1547	7175	N	L	-0.0773071	-0.0412	0.205643
1548	7175	N	H	-0.4393	-0.852	-1.70033
1549	7175	N	F	-0.48377	-0.361	-0.272394
1550	7175	N	Y	-1.58543	-0.537	-0.471597
1551	7175	N	W	-1.03833	-0.703	-1.61855
1552	7175	N	G	-0.93187	-0.0453	-1.31653
1553	7175	N	P	-0.227979	0.311	-0.947032
1554	7175	N	*	-4.17618	-1.31	-1.86586
1555	7175	M	A	-1.21205	-0.225	-0.539369
1556	7175	M	S	-1.27969	-0.903	-1.13987
1557	7175	M	T	-1.37925	-0.798	-1.38995
1558	7175	M	V	0.19431	0.304	0.518666
1559	7175	M	C	-1.634	-0.985	-1.22324
1560	7175	M	E	-1.91304	-0.84	-1.56483
1561	7175	M	D	-1.50326	-1.05	-1.1978
1562	7175	M	K	-1.17949	-0.365	-1.0596
1563	7175	M	R	-1.18867	-0.313	-4
1564	7175	M	Q	-4.34889	-0.958	-1.35223
1565	7175	M	N	-1.75814	-0.867	-4
1566	7175	M	M	-0.907004	-0.881	-1.0512
1567	7175	M	I	-0.186844	0.397	1.00993
1568	7175	M	L	-0.250015	-0.522	-0.370713
1569	7175	M	H	-0.612007	-0.992	-1.6118
1570	7175	M	F	-0.656478	-0.794	-1.56604
1571	7175	M	Y	-1.75814	-0.903	-1.1978
1572	7175	M	W	-1.21104	-0.926	-1.02345
1573	7175	M	G	-1.10458	-0.451	-1.37021
1574	7175	M	P	-0.400687	0.0952	-1.36591
1575	7175	M	*	-4.34889	-4	-1.51489
1576	7175	I	A	-0.978678	-0.888	-1.38995
1577	7175	I	S	-1.04632	-0.847	-1.1167
1578	7175	I	T	-1.14588	-1.03	-1.75793
1579	7175	I	V	0.427679	0.495	0.696203
1580	7175	I	C	-1.40063	-0.769	-0.923854
1581	7175	I	E	-1.67967	-0.605	-4
1582	7175	I	D	-1.26989	-1.14	-4
1583	7175	I	K	-0.946117	-0.363	-4
1584	7175	I	R	-0.955302	-0.153	-0.971113
1585	7175	I	Q	-4.11552	-0.889	-4
1586	7175	I	N	-1.52477	0.0946	-0.499407
1587	7175	I	M	-0.673634	-0.545	-1.21386
1588	7175	I	I	0.0465249	0.299	0.475749
1589	7175	I	L	-0.0166454	-0.344	-0.00289644
1590	7175	I	H	-0.378638	-1.27	-1.08892
1591	7175	I	F	-0.423109	0.0321	-0.315019
1592	7175	I	Y	-1.52477	-0.462	-0.158506
1593	7175	I	W	-0.977671	-0.827	-1.32179
1594	7175	I	G	-0.871208	-0.714	-1.28401
1595	7175	I	P	-0.167318	0.107	-1.49789
1596	7175	I	*	-4.11552	-0.965	-1.51489
1597	7175	L	A	-1.15516	-0.877	-1.2795
1598	7175	L	S	-1.2228	-0.699	-1.49915
1599	7175	L	T	-1.32236	-0.805	-1.28055
1600	7175	L	V	0.2512	0.341	0.568264
1601	7175	L	C	-1.57711	-0.911	-1.06659
1602	7175	L	E	-1.85615	-0.707	-1.31413
1603	7175	L	D	-1.44637	-0.826	-1.1457
1604	7175	L	K	-1.1226	-0.427	-0.965897
1605	7175	L	R	-1.13178	-0.466	-1.37136
1606	7175	L	Q	-4.292	-0.964	-1.33073
1607	7175	L	N	-1.70125	-0.625	-1.61629
1608	7175	L	M	-0.850114	-1	-1.2062
1609	7175	L	I	-0.129955	0.38	0.562212
1610	7175	L	L	-0.193125	-0.337	-0.252581
1611	7175	L	H	-0.555118	-1	-1.42424
1612	7175	L	F	-0.599588	-0.853	-0.867405
1613	7175	L	Y	-1.70125	-0.685	-1.33135
1614	7175	L	W	-1.15415	-1.03	-1.18373
1615	7175	L	G	-1.04769	-0.662	-1.31558
1616	7175	L	P	-0.343797	0.113	-1.05203
1617	7175	L	*	-4.292	-1.84	-1.4402
1618	7175	H	A	-1.09654	-0.626	-1.17899
1619	7175	H	S	-1.16418	-0.189	-0.761068
1620	7175	H	T	-1.26374	-0.278	-1.14798
1621	7175	H	V	0.309818	0.421	0.566636
1622	7175	H	C	-1.51849	-0.497	-0.297955
1623	7175	H	E	-1.79753	-0.424	-1.4187
1624	7175	H	D	-1.38775	-0.111	-1.61855
1625	7175	H	K	-1.06398	0.0791	-1.62334
1626	7175	H	R	-1.07316	-0.225	-1.33786
1627	7175	H	Q	-4.23338	-0.454	-0.881691
1628	7175	H	N	-1.64263	-0.593	-1.13521
1629	7175	H	M	-0.791496	-1	-0.736741
1630	7175	H	I	-0.0713366	0.707	0.736737
1631	7175	H	L	-0.134507	0.0264	0.24149
1632	7175	H	H	-0.4965	-0.452	-1.11438
1633	7175	H	F	-0.54097	-0.79	-0.304792
1634	7175	H	Y	-1.64263	-0.55	-0.923854
1635	7175	H	W	-1.09553	-0.965	-0.844673
1636	7175	H	G	-0.98907	0.108	-0.640828
1637	7175	H	P	-0.285179	0.277	-1.05884
1638	7175	H	*	-4.23338	-1.14	-4
1639	7175	F	A	-1.06603	-1.14	-4
1640	7175	F	S	-1.13367	-0.515	-1.40384
1641	7175	F	T	-1.23323	-0.979	-1.86586
1642	7175	F	V	0.340331	0.348	0.581644
1643	7175	F	C	-1.48798	-0.639	-1.23834
1644	7175	F	E	-1.76702	-0.642	-1.38995
1645	7175	F	D	-1.35724	-0.631	-0.539369
1646	7175	F	K	-1.03347	-0.083	-1.74349
1647	7175	F	R	-1.04265	-0.529	-1.11695
1648	7175	F	Q	-4.20287	-1.54	-1.31077
1649	7175	F	N	-1.61211	-1.21	-1.6118
1650	7175	F	M	-0.760983	-0.8	-4
1651	7175	F	I	-0.0408238	0.4	0.549961
1652	7175	F	L	-0.103994	-0.258	-0.00134659
1653	7175	F	H	-0.465987	-0.387	-1.44246
1654	7175	F	F	-0.510457	-0.785	-0.667833
1655	7175	F	Y	-1.61211	-1.64	-1.51489
1656	7175	F	W	-1.06502	-1.25	-1.69098
1657	7175	F	G	-0.958557	-0.599	-1.24248
1658	7175	F	P	-0.254666	0.0859	-0.712212
1659	7175	F	*	-4.20287	-4	-1.38995
1660	7175	Y	A	-0.915454	-0.514	-0.558727
1661	7175	Y	S	-0.983097	-0.935	-1.04028
1662	7175	Y	T	-1.08266	-0.488	-1.07594
1663	7175	Y	V	0.490903	0.212	0.418342
1664	7175	Y	C	-1.33741	-0.314	-0.268095
1665	7175	Y	E	-1.61644	-0.135	-4
1666	7175	Y	D	-1.20667	-0.544	-1.21386
1667	7175	Y	K	-0.882893	-0.291	-1.51489
1668	7175	Y	R	-0.892078	-0.273	-1.37911
1669	7175	Y	Q	-4.0523	-0.847	-4
1670	7175	Y	N	-1.46154	-0.45	-1.05214
1671	7175	Y	M	-0.610411	-0.879	-0.965337
1672	7175	Y	I	0.109749	0.56	0.715076
1673	7175	Y	L	0.0465785	0.0698	0.300069
1674	7175	Y	H	-0.315414	-1.17	-0.757564
1675	7175	Y	F	-0.359885	-0.283	-0.0956713
1676	7175	Y	Y	-1.46154	-0.334	-0.844673
1677	7175	Y	W	-0.914447	-1.14	-4
1678	7175	Y	G	-0.807985	-0.365	-0.98173
1679	7175	Y	P	-0.104094	0.126	-1.02216
1680	7175	Y	*	-4.0523	-1.14	-4
1681	7175	W	A	-1.48589	-1.13	-1.26501
1682	7175	W	S	-1.55353	-1.19	-1.25048
1683	7175	W	T	-1.65309	-0.994	-1.6118
1684	7175	W	V	-0.0795299	-0.111	-0.0804975
1685	7175	W	C	-1.90784	-0.595	-1.28665
1686	7175	W	E	-2.18688	-0.706	-1.31752
1687	7175	W	D	-1.7771	-1.14	-0.495693
1688	7175	W	K	-1.45333	-0.378	-4
1689	7175	W	R	-1.46251	-0.457	-1.31669
1690	7175	W	Q	-4.62273	-0.839	-4
1691	7175	W	N	-2.03198	-1.28	-1.15587
1692	7175	W	M	-1.18084	-0.739	-4
1693	7175	W	I	-0.460684	0.175	0.256018
1694	7175	W	L	-0.523855	-0.303	-0.245915
1695	7175	W	H	-0.885848	-0.444	-1.6855
1696	7175	W	F	-0.930318	-0.62	-1.4187
1697	7175	W	Y	-2.03198	-0.84	-1.74349
1698	7175	W	W	-1.48488	-1.05	-1.22756
1699	7175	W	G	-1.37842	-0.619	-1.26415
1700	7175	W	P	-0.674527	-0.368	-0.943572
1701	7175	W	*	-4.62273	-0.889	-4
1702	7175	G	A	-1.74351	0.169	-0.88962
1703	7175	G	S	-1.81116	0.163	-0.822995
1704	7175	G	T	-1.91072	0.15	-1.13016
1705	7175	G	V	-0.337156	0.0553	-0.341841
1706	7175	G	C	-2.16547	-0.0903	-0.974019
1707	7175	G	E	-2.4445	-0.0299	-0.878395
1708	7175	G	D	-2.03473	0.061	-0.933935
1709	7175	G	K	-1.71095	0.449	-1.30025
1710	7175	G	R	-1.72014	0.217	-0.983791
1711	7175	G	Q	-4.88036	-0.0405	-1.0805
1712	7175	G	N	-2.2896	0.164	-1.44561
1713	7175	G	M	-1.43847	0.201	-0.494037
1714	7175	G	I	-0.718311	-0.303	-0.286705
1715	7175	G	L	-0.781481	-0.164	-0.715326
1716	7175	G	H	-1.14347	0.0376	-4
1717	7175	G	F	-1.18794	-0.565	-0.953113
1718	7175	G	Y	-2.2896	-0.119	-0.926424
1719	7175	G	W	-1.74251	-0.68	-1.15098
1720	7175	G	G	-1.63604	0.186	-1.04812
1721	7175	G	P	-0.932153	0.223	-1.10184
1722	7175	G	*	-4.88036	-1.49	-1.86707
1723	7175	P	A	-2.18224	0.0674	-1.56483
1724	7175	P	S	-2.24988	-0.0868	-1.07842
1725	7175	P	T	-2.34944	-0.285	-1.2305
1726	7175	P	V	-0.775884	-0.479	-0.964206
1727	7175	P	C	-2.6042	-0.204	-0.941583
1728	7175	P	E	-2.88323	-0.268	-0.932714
1729	7175	P	D	-2.47346	-0.373	-1.67398
1730	7175	P	K	-2.14968	0.319	-0.589175
1731	7175	P	R	-2.15887	0.146	-0.982374
1732	7175	P	Q	-5.31909	-0.39	-1.32587
1733	7175	P	N	-2.72833	-0.0993	-1.14842
1734	7175	P	M	-1.8772	-0.15	-4
1735	7175	P	I	-1.15704	-0.595	-0.796346
1736	7175	P	L	-1.22021	-0.35	-1.07611
1737	7175	P	H	-1.5822	-0.111	-0.964579
1738	7175	P	F	-1.62667	-0.447	-4
1739	7175	P	Y	-2.72833	-0.936	-0.719734
1740	7175	P	W	-2.18123	-0.815	-1.19686
1741	7175	P	G	-2.07477	-0.211	-1.67267
1742	7175	P	P	-1.37088	0.208	-1.04909
1743	7175	P	*	-5.31909	-0.791	-4
1744	7175	*	A	-5.49316	-1.38	-1.17383
1745	7175	*	S	-5.5608	-1.51	-1.35127
1746	7175	*	T	-5.66036	-1.49	-1.61855
1747	7175	*	V	-4.0868	-4	-1.31752
1748	7175	*	C	-5.91511	-0.686	-1.09738
1749	7175	*	E	-6.19415	-1.14	-0.543643
1750	7175	*	D	-5.78437	-1.36	-4
1751	7175	*	K	-5.4606	-2.19	-1.81214
1752	7175	*	R	-5.46978	-1.64	-1.70305
1753	7175	*	Q	-8.63	-1.15	-1.35967
1754	7175	*	N	-6.03924	-1.72	-1.63983
1755	7175	*	M	-5.18811	-1.27	-1.31752
1756	7175	*	I	-4.46795	-4	-1.31752
1757	7175	*	L	-4.53112	-1.13	-1.8404
1758	7175	*	H	-4.89312	-0.975	-1.71973
1759	7175	*	F	-4.93759	-4	-4
1760	7175	*	Y	-6.03924	-4	-1.69098
1761	7175	*	W	-5.49215	-1.18	-1.62282
1762	7175	*	G	-5.38569	-1.15	-1.50631
1763	7175	*	P	-4.6818	-1.16	-4
1764	7175	*	*	-8.63	-4	-1.02076
1765	7176	A	A	0.363021	0.503	0.495114
1766	7176	A	S	0.286723	0.252	0.375486
1767	7176	A	T	0.159728	0.0816	0.30205
1768	7176	A	V	0.192643	0.128	0.529665
1769	7176	A	C	0.588988	0.434	0.436808
1770	7176	A	E	0.510951	0.169	0.378494
1771	7176	A	D	0.159054	-0.0405	-0.0967446
1772	7176	A	K	-0.308885	0.0317	-0.494108
1773	7176	A	R	-0.469858	-0.137	-0.656521
1774	7176	A	Q	0.432414	0.342	0.380324
1775	7176	A	N	0.48485	0.0726	0.358414
1776	7176	A	M	0.323212	0.725	0.927654
1777	7176	A	I	0.358197	-0.315	-0.101509
1778	7176	A	L	0.433452	0.212	0.492807
1779	7176	A	H	0.22983	0.322	0.403074
1780	7176	A	F	0.0192651	0.19	0.323553
1781	7176	A	Y	-0.0609833	0.441	0.595468
1782	7176	A	W	-0.163465	-0.0322	-0.306797
1783	7176	A	G	0.405881	0.305	0.0288089
1784	7176	A	P	0.373213	-0.0386	-0.308832
1785	7176	A	*	-0.323489	-0.703	-1.10489
1786	7176	S	A	0.47906	0.373	0.560449
1787	7176	S	S	0.402763	0.594	0.791923
1788	7176	S	T	0.275768	0.398	0.63584
1789	7176	S	V	0.308683	0.438	0.59881
1790	7176	S	C	0.705027	0.574	0.450049
1791	7176	S	E	0.62699	0.318	0.495502
1792	7176	S	D	0.275093	0.295	0.594861
1793	7176	S	K	-0.192846	0.143	-0.664771
1794	7176	S	R	-0.353819	0.111	-1.01339
1795	7176	S	Q	0.548453	0.443	0.642824
1796	7176	S	N	0.60089	0.335	0.693681
1797	7176	S	M	0.439252	0.465	0.69544
1798	7176	S	I	0.474236	0.408	0.685863
1799	7176	S	L	0.549492	0.445	0.618592
1800	7176	S	H	0.345869	0.45	0.518295
1801	7176	S	F	0.135304	0.382	0.612488
1802	7176	S	Y	0.055056	0.0983	0.276753
1803	7176	S	W	-0.0474253	0.35	-0.229887
1804	7176	S	G	0.52192	0.282	0.262035
1805	7176	S	P	0.489252	0.643	0.773176
1806	7176	S	*	-0.20745	-0.515	-0.120914
1807	7176	T	A	0.55691	0.331	0.48425
1808	7176	T	S	0.480613	0.313	0.521141
1809	7176	T	T	0.353618	0.358	0.604067
1810	7176	T	V	0.386532	0.19	0.528212
1811	7176	T	C	0.782877	0.402	0.547452
1812	7176	T	E	0.70484	0.262	0.429676
1813	7176	T	D	0.352943	0.116	0.388655
1814	7176	T	K	-0.114996	0.0915	-0.37334
1815	7176	T	R	-0.275969	0.0119	-0.867318
1816	7176	T	Q	0.626303	0.313	0.49271
1817	7176	T	N	0.678739	0.545	0.781483
1818	7176	T	M	0.517102	0.383	0.657967
1819	7176	T	I	0.552086	0.219	0.553541
1820	7176	T	L	0.627341	0.398	0.630665
1821	7176	T	H	0.423719	0.3	0.463975
1822	7176	T	F	0.213154	0.0683	0.407923
1823	7176	T	Y	0.132906	0.236	0.362973
1824	7176	T	W	0.0304246	-0.17	-0.552046
1825	7176	T	G	0.59977	0.409	0.619389
1826	7176	T	P	0.567102	0.406	0.616569
1827	7176	T	*	-0.1296	-0.699	-0.728127
1828	7176	V	A	0.687036	0.336	0.495197
1829	7176	V	S	0.610739	0.422	0.597017
1830	7176	V	T	0.483744	0.44	0.68074
1831	7176	V	V	0.516658	0.283	0.5028
1832	7176	V	C	0.913003	0.23	0.365597
1833	7176	V	E	0.834966	0.356	0.560374
1834	7176	V	D	0.483069	0.0141	0.45456
1835	7176	V	K	0.0151298	0.188	-0.00746114
1836	7176	V	R	-0.145843	0.118	-0.652662
1837	7176	V	Q	0.756429	0.294	0.521534
1838	7176	V	N	0.808865	0.595	0.889481
1839	7176	V	M	0.647228	0.476	0.733982
1840	7176	V	I	0.682212	0.0703	0.357503
1841	7176	V	L	0.757467	0.16	0.218473
1842	7176	V	H	0.553845	0.36	0.548415
1843	7176	V	F	0.34328	0.209	-0.717488
1844	7176	V	Y	0.263032	0.22	0.475264
1845	7176	V	W	0.160551	-0.456	-0.429642
1846	7176	V	G	0.729896	0.594	0.78206
1847	7176	V	P	0.697228	0.506	0.72458
1848	7176	V	*	0.000525758	-1.11	-0.508888
1849	7176	C	A	0.459765	0.633	0.531605
1850	7176	C	S	0.383467	0.595	0.513848
1851	7176	C	T	0.256472	0.69	0.88392
1852	7176	C	V	0.289387	0.765	0.744359
1853	7176	C	C	0.685732	0.438	0.313629
1854	7176	C	E	0.607695	0.263	0.340749
1855	7176	C	D	0.255798	0.124	0.256894
1856	7176	C	K	-0.212141	0.272	-0.348279
1857	7176	C	R	-0.373114	0.18	-0.752904
1858	7176	C	Q	0.529158	-0.138	0.0760554
1859	7176	C	N	0.581594	0.527	0.637984
1860	7176	C	M	0.419956	0.595	0.642008
1861	7176	C	I	0.454941	0.471	0.464209
1862	7176	C	L	0.530196	0.469	0.238368
1863	7176	C	H	0.326574	0.254	0.21203
1864	7176	C	F	0.116009	0.172	-0.105337
1865	7176	C	Y	0.0357607	0.663	0.662084
1866	7176	C	W	-0.0667206	-0.375	-0.351379
1867	7176	C	G	0.502625	0.869	0.882054
1868	7176	C	P	0.469957	0.346	0.189445
1869	7176	C	*	-0.226745	-1.02	-0.963681
1870	7176	E	A	-0.792491	0.0702	0.202766
1871	7176	E	S	-0.868789	-0.113	0.176008
1872	7176	E	T	-0.995784	-0.388	-0.215755
1873	7176	E	V	-0.962869	-0.463	-0.72806
1874	7176	E	C	-0.566525	-0.0382	0.359457
1875	7176	E	E	-0.644562	-0.48	-0.538013
1876	7176	E	D	-0.996459	-0.356	-0.774875
1877	7176	E	K	-1.4644	0.535	0.838496
1878	7176	E	R	-1.62537	0.627	0.775424
1879	7176	E	Q	-0.723098	0.216	0.41866
1880	7176	E	N	-0.670662	-0.304	-0.332259
1881	7176	E	M	-0.8323	-0.0503	0.0208991
1882	7176	E	I	-0.797315	-0.398	-0.730998
1883	7176	E	L	-0.72206	-0.153	-0.0809469
1884	7176	E	H	-0.925683	0.333	0.972414
1885	7176	E	F	-1.13625	-0.0341	0.347359
1886	7176	E	Y	-1.2165	0.157	0.281274
1887	7176	E	W	-1.31898	-0.293	-0.9851
1888	7176	E	G	-0.749631	0.0351	0.0112194
1889	7176	E	P	-0.7823	-0.152	-0.225262
1890	7176	E	*	-1.479	-1.74	-1.81592
1891	7176	D	A	-0.516074	0.581	0.813874
1892	7176	D	S	-0.592372	0.0547	0.304528
1893	7176	D	T	-0.719367	0.157	0.37959
1894	7176	D	V	-0.686452	-0.00843	0.147505
1895	7176	D	C	-0.290108	0.368	0.536672
1896	7176	D	E	-0.368145	-0.111	-0.138271
1897	7176	D	D	-0.720042	-0.108	0.0612702
1898	7176	D	K	-1.18798	0.571	0.668193
1899	7176	D	R	-1.34895	0.501	0.621768
1900	7176	D	Q	-0.446681	0.334	0.682289
1901	7176	D	N	-0.394245	-0.199	-0.0489864
1902	7176	D	M	-0.555883	0.485	0.557016
1903	7176	D	I	-0.520898	0.00152	0.509811
1904	7176	D	L	-0.445643	0.394	0.580488
1905	7176	D	H	-0.649266	0.695	0.86111
1906	7176	D	F	-0.85983	0.516	0.76504
1907	7176	D	Y	-0.940079	0.645	0.894538
1908	7176	D	W	-1.04256	-0.197	0.137598
1909	7176	D	G	-0.473214	0.387	0.0466694
1910	7176	D	P	-0.505883	-0.103	-0.0425497
1911	7176	D	*	-1.20258	-1.42	-1.17712
1912	7176	K	A	0.51902	0.361	-0.289134
1913	7176	K	S	0.442723	0.292	-0.345065
1914	7176	K	T	0.315728	-0.148	-0.846056
1915	7176	K	V	0.348642	-0.339	-0.875876
1916	7176	K	C	0.744987	0.386	0.109159
1917	7176	K	E	0.66695	0.267	0.538003
1918	7176	K	D	0.315053	-0.23	-0.239154
1919	7176	K	K	-0.152886	-0.0171	-1.01869
1920	7176	K	R	-0.313859	-0.173	-0.944698
1921	7176	K	Q	0.588413	0.191	-0.409559
1922	7176	K	N	0.640849	-0.0895	-0.644377
1923	7176	K	M	0.479212	-0.465	-0.583457
1924	7176	K	I	0.514196	-0.492	-0.816663
1925	7176	K	L	0.589452	-0.593	-0.88924
1926	7176	K	H	0.385829	0.252	-0.530865
1927	7176	K	F	0.175264	-0.625	-0.978202
1928	7176	K	Y	0.0950159	-0.0894	-0.321503
1929	7176	K	W	-0.00746532	-0.915	-1.33401
1930	7176	K	G	0.56188	-0.272	-0.908736
1931	7176	K	P	0.529212	0.211	-0.694497
1932	7176	K	*	-0.16749	-1.15	-1.41541
1933	7176	R	A	-0.0567688	-0.0659	-0.833365
1934	7176	R	S	-0.133067	0.0138	-0.900316
1935	7176	R	T	-0.260062	0.114	-0.932459
1936	7176	R	V	-0.227147	-0.0691	-0.936136
1937	7176	R	C	0.169198	0.182	-0.329542
1938	7176	R	E	0.0911608	0.259	0.429539
1939	7176	R	D	-0.260736	0.203	0.45286
1940	7176	R	K	-0.728675	-0.108	-1.41527
1941	7176	R	R	-0.889648	-0.143	-1.33087
1942	7176	R	Q	0.0126241	-0.0899	-0.934227
1943	7176	R	N	0.0650603	0.128	-0.848816
1944	7176	R	M	-0.0965776	-0.0954	-0.779124
1945	7176	R	I	-0.061593	-0.41	-0.829785
1946	7176	R	L	0.0136623	-0.241	-0.982197
1947	7176	R	H	-0.18996	0.0638	-1.03721
1948	7176	R	F	-0.400525	-0.817	-1.12436
1949	7176	R	Y	-0.480773	-0.342	-1.19031
1950	7176	R	W	-0.583255	-0.587	-1.38995
1951	7176	R	G	-0.0139088	-0.158	-1.06276
1952	7176	R	P	-0.0465774	0.0771	-0.946283
1953	7176	R	*	-0.743279	-1.42	-1.44561
1954	7176	Q	A	0.210761	0.383	0.656013
1955	7176	Q	S	0.134463	0.65	0.820782
1956	7176	Q	T	0.00746821	0.0753	0.210865
1957	7176	Q	V	0.040383	0.0877	0.573565
1958	7176	Q	C	0.436728	0.574	0.490052
1959	7176	Q	E	0.358691	0.114	0.44967
1960	7176	Q	D	0.0067936	-0.416	0.103026
1961	7176	Q	K	-0.461146	0.0695	-0.447264
1962	7176	Q	R	-0.622119	0.0378	-0.658203
1963	7176	Q	Q	0.280154	0.479	0.61477
1964	7176	Q	N	0.33259	0.197	0.446691
1965	7176	Q	M	0.170952	0.543	0.789326
1966	7176	Q	I	0.205937	-0.0825	0.17271
1967	7176	Q	L	0.281192	0.321	0.672419
1968	7176	Q	H	0.0775696	0.228	0.392851
1969	7176	Q	F	-0.132995	0.291	0.54291
1970	7176	Q	Y	-0.213244	0.748	0.974835
1971	7176	Q	W	-0.315725	0.248	0.152013
1972	7176	Q	G	0.253621	0.514	0.685431
1973	7176	Q	P	0.220952	0.465	0.691877
1974	7176	Q	*	-0.47575	-1.11	-1.19686
1975	7176	N	A	0.305887	0.504	0.642331
1976	7176	N	S	0.229589	0.39	0.617476
1977	7176	N	T	0.102594	0.419	0.71585
1978	7176	N	V	0.135509	0.623	0.880735
1979	7176	N	C	0.531854	0.3	0.442586
1980	7176	N	E	0.453817	0.284	0.484263
1981	7176	N	D	0.10192	0.171	0.449045
1982	7176	N	K	-0.36602	0.0452	-0.4856
1983	7176	N	R	-0.526993	0.074	-0.70343
1984	7176	N	Q	0.37528	0.473	0.682832
1985	7176	N	N	0.427716	0.488	0.776414
1986	7176	N	M	0.266078	0.269	0.556868
1987	7176	N	I	0.301063	0.578	0.847169
1988	7176	N	L	0.376318	0.237	0.550463
1989	7176	N	H	0.172696	0.508	0.722128
1990	7176	N	F	-0.0378691	0.0906	0.40466
1991	7176	N	Y	-0.118118	0.23	0.451451
1992	7176	N	W	-0.220599	0.362	0.41237
1993	7176	N	G	0.348747	0.613	0.83424
1994	7176	N	P	0.316078	0.48	0.665181
1995	7176	N	*	-0.380624	-0.756	-0.605139
1996	7176	M	A	0.133179	0.431	0.586035
1997	7176	M	S	0.0568817	0.485	0.769846
1998	7176	M	T	-0.0701133	0.609	0.841284
1999	7176	M	V	-0.0371986	0.437	0.610687
[truncated: 4,616 more rows]
